# Supplementary material for: Quick assessment for systematic test statistic inflation/deflation due to null model misspecifications in genome-wide environment interaction studies
Source: PubMed Central journal article supplement (PMC6638962; doi:10.1371/journal.pone.0219825), 2019-07-18
Supplement: pone.0219825.s009.pdf [file pone.0219825.s009.pdf]

**S2 Table. Comparison between  $l_{approx}$  and  $l_{mean}$  in quantitative phenotype simulations**

| Scenario             |   | GxE ( $n = 1000$ ) |                |                               | Marginal ( $n = 1000$ ) |                |                               | GxE ( $n = 10000$ ) |                |                               | Marginal ( $n = 10000$ ) |                |                               |
|----------------------|---|--------------------|----------------|-------------------------------|-------------------------|----------------|-------------------------------|---------------------|----------------|-------------------------------|--------------------------|----------------|-------------------------------|
| $(b_G, b_{GE}, b_Z)$ | M | $l_{approx}$       | $l_{mean}$     | $\frac{l_{approx}}{l_{mean}}$ | $l_{approx}$            | $l_{mean}$     | $\frac{l_{approx}}{l_{mean}}$ | $l_{approx}$        | $l_{mean}$     | $\frac{l_{approx}}{l_{mean}}$ | $l_{approx}$             | $l_{mean}$     | $\frac{l_{approx}}{l_{mean}}$ |
| Base (1,0,0)         | r | 1.01<br>(0.03)     | 1.01<br>(0.04) | 1.00<br>(0.02)                | 1.00<br>(0.00)          | 1.01<br>(0.03) | 1.00<br>(0.03)                | 1.00<br>(0.01)      | 1.05<br>(0.03) | 0.95<br>(0.02)                | 1.00<br>(0.00)           | 1.10<br>(0.04) | 0.91<br>(0.03)                |
| Base (1,0,0)         | d | 1.00<br>(0.03)     | 1.04<br>(0.04) | 0.97<br>(0.02)                | 1.00<br>(0.00)          | 1.07<br>(0.03) | 0.94<br>(0.03)                | 1.00<br>(0.01)      | 1.21<br>(0.03) | 0.83<br>(0.02)                | 1.00<br>(0.00)           | 1.42<br>(0.05) | 0.71<br>(0.02)                |
| Base (0,0,1)         | r | 1.15<br>(0.05)     | 1.18<br>(0.06) | 0.98<br>(0.02)                | 1.00<br>(0.00)          | 1.01<br>(0.03) | 1.00<br>(0.03)                | 1.03<br>(0.01)      | 1.05<br>(0.03) | 0.98<br>(0.02)                | 1.00<br>(0.00)           | 1.00<br>(0.03) | 1.00<br>(0.03)                |
| Base (0,0,1)         | d | 1.20<br>(0.05)     | 1.25<br>(0.06) | 0.96<br>(0.02)                | 1.00<br>(0.00)          | 1.00<br>(0.03) | 1.00<br>(0.03)                | 1.16<br>(0.02)      | 1.45<br>(0.04) | 0.80<br>(0.02)                | 1.00<br>(0.00)           | 1.00<br>(0.03) | 1.00<br>(0.03)                |
| 1a (1,0,0)           | r | 1.01<br>(0.03)     | 1.02<br>(0.04) | 0.99<br>(0.02)                | 1.00<br>(0.00)          | 1.02<br>(0.03) | 0.98<br>(0.03)                | 1.00<br>(0.01)      | 1.16<br>(0.03) | 0.86<br>(0.02)                | 1.00<br>(0.00)           | 1.32<br>(0.04) | 0.76<br>(0.03)                |
| 1a (1,0,0)           | d | 1.01<br>(0.03)     | 1.06<br>(0.04) | 0.95<br>(0.02)                | 1.00<br>(0.00)          | 1.11<br>(0.03) | 0.90<br>(0.03)                | 1.00<br>(0.01)      | 1.32<br>(0.03) | 0.76<br>(0.02)                | 1.00<br>(0.00)           | 1.64<br>(0.05) | 0.61<br>(0.02)                |
| 1a (0,0,1)           | r | 1.03<br>(0.04)     | 1.03<br>(0.04) | 1.00<br>(0.02)                | 1.00<br>(0.00)          | 1.01<br>(0.03) | 1.00<br>(0.03)                | 1.02<br>(0.01)      | 1.03<br>(0.03) | 0.99<br>(0.02)                | 1.00<br>(0.00)           | 1.00<br>(0.03) | 1.00<br>(0.03)                |
| 1a (0,0,1)           | d | 1.16<br>(0.05)     | 1.19<br>(0.06) | 0.97<br>(0.02)                | 1.00<br>(0.00)          | 1.00<br>(0.03) | 1.00<br>(0.03)                | 1.19<br>(0.02)      | 1.70<br>(0.04) | 0.70<br>(0.01)                | 1.00<br>(0.00)           | 1.00<br>(0.03) | 1.00<br>(0.03)                |
| 1b (0,0,0)           | a | 1.00<br>(0.03)     | 1.01<br>(0.04) | 1.00<br>(0.02)                | 1.00<br>(0.00)          | 1.01<br>(0.03) | 1.00<br>(0.03)                | 1.00<br>(0.01)      | 1.00<br>(0.02) | 1.00<br>(0.02)                | 1.00<br>(0.00)           | 1.00<br>(0.03) | 1.00<br>(0.03)                |
| 1b (1,0,0)           | a | 1.01<br>(0.03)     | 1.03<br>(0.04) | 0.98<br>(0.02)                | 1.00<br>(0.00)          | 1.05<br>(0.03) | 0.96<br>(0.03)                | 1.01<br>(0.01)      | 1.38<br>(0.03) | 0.73<br>(0.02)                | 1.00<br>(0.00)           | 1.74<br>(0.06) | 0.57<br>(0.02)                |
| 1b (1,0,0)           | r | 1.00<br>(0.02)     | 1.03<br>(0.03) | 0.97<br>(0.02)                | 1.00<br>(0.00)          | 1.06<br>(0.04) | 0.95<br>(0.03)                | 1.00<br>(0.01)      | 1.01<br>(0.03) | 0.99<br>(0.02)                | 1.00<br>(0.00)           | 1.02<br>(0.03) | 0.98<br>(0.03)                |
| 1b (1,0,0)           | d | 1.00<br>(0.03)     | 1.04<br>(0.04) | 0.96<br>(0.02)                | 1.00<br>(0.00)          | 1.09<br>(0.03) | 0.93<br>(0.03)                | 0.99<br>(0.01)      | 1.46<br>(0.03) | 0.68<br>(0.01)                | 1.00<br>(0.00)           | 1.93<br>(0.05) | 0.52<br>(0.01)                |
| 1b (0,1,0)           | a | 1.01<br>(0.03)     | 1.01<br>(0.04) | 1.00<br>(0.02)                | 1.00<br>(0.00)          | 1.00<br>(0.03) | 1.00<br>(0.03)                | 1.00<br>(0.01)      | 1.00<br>(0.02) | 1.00<br>(0.02)                | 1.00<br>(0.00)           | 1.00<br>(0.03) | 1.00<br>(0.03)                |
| 1b (0,0,1)           | a | 1.02<br>(0.03)     | 1.05<br>(0.04) | 0.97<br>(0.02)                | 1.00<br>(0.00)          | 1.05<br>(0.04) | 0.95<br>(0.03)                | 1.01<br>(0.01)      | 1.13<br>(0.03) | 0.90<br>(0.02)                | 1.00<br>(0.00)           | 1.21<br>(0.04) | 0.83<br>(0.03)                |
| 1b (0,0,1)           | r | 1.01<br>(0.03)     | 1.02<br>(0.04) | 1.00<br>(0.02)                | 1.00<br>(0.00)          | 1.02<br>(0.03) | 0.99<br>(0.03)                | 1.01<br>(0.01)      | 1.04<br>(0.02) | 0.97<br>(0.02)                | 1.00<br>(0.00)           | 1.05<br>(0.03) | 0.96<br>(0.03)                |
| 1b (0,0,1)           | d | 1.00<br>(0.03)     | 1.02<br>(0.04) | 0.99<br>(0.02)                | 1.00<br>(0.00)          | 1.03<br>(0.03) | 0.98<br>(0.03)                | 1.00<br>(0.01)      | 1.12<br>(0.02) | 0.90<br>(0.02)                | 1.00<br>(0.00)           | 1.23<br>(0.04) | 0.82<br>(0.03)                |
| 1c (0,0,0)           | a | 1.00<br>(0.03)     | 1.01<br>(0.04) | 1.00<br>(0.02)                | 1.00<br>(0.00)          | 1.01<br>(0.03) | 1.00<br>(0.03)                | 1.00<br>(0.01)      | 1.00<br>(0.03) | 1.00<br>(0.02)                | 1.00<br>(0.00)           | 1.00<br>(0.03) | 1.00<br>(0.03)                |
| 1c (1,0,0)           | a | 1.01<br>(0.03)     | 1.13<br>(0.04) | 0.89<br>(0.02)                | 1.00<br>(0.00)          | 1.25<br>(0.04) | 0.80<br>(0.03)                | 1.00<br>(0.01)      | 2.18<br>(0.05) | 0.46<br>(0.01)                | 1.00<br>(0.00)           | 3.35<br>(0.09) | 0.30<br>(0.01)                |
| 1c (1,0,0)           | r | 1.00<br>(0.03)     | 1.01<br>(0.04) | 1.00<br>(0.02)                | 1.00<br>(0.00)          | 1.00<br>(0.03) | 1.00<br>(0.03)                | 1.00<br>(0.01)      | 1.11<br>(0.03) | 0.90<br>(0.02)                | 1.00<br>(0.00)           | 1.21<br>(0.04) | 0.82<br>(0.03)                |
| 1c (1,0,0)           | d | 1.00<br>(0.03)     | 1.05<br>(0.04) | 0.96<br>(0.02)                | 1.00<br>(0.00)          | 1.10<br>(0.03) | 0.91<br>(0.03)                | 1.00<br>(0.01)      | 1.32<br>(0.03) | 0.76<br>(0.02)                | 1.00<br>(0.00)           | 1.64<br>(0.05) | 0.61<br>(0.02)                |
| 1c (0,1,0)           | a | 1.00<br>(0.03)     | 1.00<br>(0.04) | 1.00<br>(0.02)                | 1.00<br>(0.00)          | 1.00<br>(0.03) | 1.00<br>(0.03)                | 1.00<br>(0.01)      | 1.00<br>(0.02) | 1.00<br>(0.02)                | 1.00<br>(0.00)           | 1.00<br>(0.03) | 1.00<br>(0.03)                |
| 1c (0,0,1)           | a | 1.01<br>(0.03)     | 1.03<br>(0.04) | 0.98<br>(0.02)                | 1.00<br>(0.00)          | 1.05<br>(0.03) | 0.96<br>(0.03)                | 1.00<br>(0.01)      | 1.14<br>(0.03) | 0.88<br>(0.02)                | 1.00<br>(0.00)           | 1.29<br>(0.04) | 0.78<br>(0.02)                |
| 1c (0,0,1)           | r | 1.01<br>(0.03)     | 1.01<br>(0.04) | 1.00<br>(0.02)                | 1.00<br>(0.00)          | 1.01<br>(0.03) | 1.00<br>(0.03)                | 1.00<br>(0.01)      | 1.00<br>(0.03) | 1.00<br>(0.02)                | 1.00<br>(0.00)           | 1.00<br>(0.03) | 1.00<br>(0.03)                |
| 1c (0,0,1)           | d | 1.01<br>(0.03)     | 1.02<br>(0.04) | 0.99<br>(0.02)                | 1.00<br>(0.00)          | 1.02<br>(0.03) | 0.98<br>(0.03)                | 1.00<br>(0.01)      | 1.14<br>(0.02) | 0.87<br>(0.02)                | 1.00<br>(0.00)           | 1.29<br>(0.04) | 0.78<br>(0.02)                |

Mean and standard deviation (SD) for  $l_{approx}$ ,  $l_{mean}$  and the ratio  $l_{approx}/l_{mean}$  are shown over 200 simulation runs for gene-environment (GxE) interaction and marginal association analyses for two sample sizes,  $n = 1000$  and  $10000$ . M, genotype model (a: additive, r: recessive, d: dominant).  $b_G$ ,  $b_{GE}$  and  $b_Z$  are effect size parameters of genotype, gene-environment interaction and covariate, respectively; 0 and 1 denote absence and presence of effect.

**S2 Table (continued). Comparison between  $l_{approx}$  and  $l_{mean}$  in quantitative phenotype simulations**

| Scenario             |   | GxE ( $n = 1000$ ) |                |                               | Marginal ( $n = 1000$ ) |                |                               | GxE ( $n = 10000$ ) |                |                               | Marginal ( $n = 10000$ ) |                |                               |
|----------------------|---|--------------------|----------------|-------------------------------|-------------------------|----------------|-------------------------------|---------------------|----------------|-------------------------------|--------------------------|----------------|-------------------------------|
| $(b_G, b_{GE}, b_Z)$ | M | $l_{approx}$       | $l_{mean}$     | $\frac{l_{approx}}{l_{mean}}$ | $l_{approx}$            | $l_{mean}$     | $\frac{l_{approx}}{l_{mean}}$ | $l_{approx}$        | $l_{mean}$     | $\frac{l_{approx}}{l_{mean}}$ | $l_{approx}$             | $l_{mean}$     | $\frac{l_{approx}}{l_{mean}}$ |
| 1d (0,0,0)           | a | 1.00<br>(0.03)     | 1.00<br>(0.04) | 1.00<br>(0.02)                | 1.00<br>(0.00)          | 1.01<br>(0.03) | 1.00<br>(0.03)                | 1.00<br>(0.01)      | 1.00<br>(0.02) | 1.00<br>(0.02)                | 1.00<br>(0.00)           | 1.00<br>(0.03) | 1.00<br>(0.03)                |
| 1d (1,0,0)           | a | 1.01<br>(0.03)     | 1.10<br>(0.05) | 0.92<br>(0.02)                | 1.00<br>(0.00)          | 1.18<br>(0.04) | 0.85<br>(0.03)                | 1.00<br>(0.01)      | 2.24<br>(0.05) | 0.45<br>(0.01)                | 1.00<br>(0.00)           | 3.48<br>(0.09) | 0.29<br>(0.01)                |
| 1d (1,0,0)           | r | 1.01<br>(0.03)     | 1.02<br>(0.03) | 0.99<br>(0.02)                | 1.00<br>(0.00)          | 1.02<br>(0.03) | 0.98<br>(0.03)                | 1.00<br>(0.01)      | 1.25<br>(0.03) | 0.80<br>(0.02)                | 1.00<br>(0.00)           | 1.49<br>(0.05) | 0.67<br>(0.02)                |
| 1d (1,0,0)           | d | 1.01<br>(0.03)     | 1.04<br>(0.04) | 0.96<br>(0.02)                | 1.00<br>(0.00)          | 1.08<br>(0.03) | 0.93<br>(0.03)                | 1.00<br>(0.01)      | 1.51<br>(0.03) | 0.66<br>(0.01)                | 1.00<br>(0.00)           | 2.01<br>(0.06) | 0.50<br>(0.01)                |
| 1d (0,1,0)           | a | 1.01<br>(0.03)     | 1.01<br>(0.04) | 1.00<br>(0.02)                | 1.00<br>(0.00)          | 1.01<br>(0.03) | 1.00<br>(0.03)                | 1.00<br>(0.01)      | 1.00<br>(0.02) | 1.00<br>(0.02)                | 1.00<br>(0.00)           | 1.00<br>(0.03) | 1.00<br>(0.03)                |
| 1d (0,0,1)           | a | 1.05<br>(0.04)     | 1.07<br>(0.05) | 0.99<br>(0.02)                | 1.00<br>(0.00)          | 1.01<br>(0.03) | 1.00<br>(0.03)                | 1.33<br>(0.02)      | 2.54<br>(0.06) | 0.52<br>(0.01)                | 1.00<br>(0.00)           | 1.00<br>(0.03) | 1.00<br>(0.03)                |
| 1d (0,0,1)           | r | 1.16<br>(0.05)     | 1.18<br>(0.06) | 0.98<br>(0.02)                | 1.00<br>(0.00)          | 1.01<br>(0.04) | 1.00<br>(0.03)                | 1.00<br>(0.01)      | 1.00<br>(0.02) | 1.00<br>(0.02)                | 1.00<br>(0.00)           | 1.00<br>(0.03) | 1.00<br>(0.03)                |
| 1d (0,0,1)           | d | 1.21<br>(0.05)     | 1.26<br>(0.06) | 0.96<br>(0.02)                | 1.00<br>(0.00)          | 1.01<br>(0.03) | 1.00<br>(0.03)                | 1.20<br>(0.02)      | 1.69<br>(0.04) | 0.71<br>(0.01)                | 1.00<br>(0.00)           | 1.00<br>(0.03) | 1.00<br>(0.03)                |
| 2a (1,0,0)           | r | 1.01<br>(0.03)     | 1.04<br>(0.04) | 0.97<br>(0.02)                | 1.00<br>(0.00)          | 1.06<br>(0.03) | 0.95<br>(0.03)                | 1.00<br>(0.01)      | 1.19<br>(0.03) | 0.84<br>(0.02)                | 1.00<br>(0.00)           | 1.38<br>(0.04) | 0.73<br>(0.02)                |
| 2a (1,0,0)           | d | 1.00<br>(0.03)     | 1.05<br>(0.04) | 0.96<br>(0.02)                | 1.00<br>(0.00)          | 1.10<br>(0.04) | 0.92<br>(0.03)                | 1.00<br>(0.01)      | 1.49<br>(0.03) | 0.67<br>(0.01)                | 1.00<br>(0.00)           | 1.99<br>(0.06) | 0.50<br>(0.01)                |
| 2a (0,0,1)           | r | 1.11<br>(0.05)     | 1.12<br>(0.06) | 0.99<br>(0.02)                | 1.00<br>(0.00)          | 1.00<br>(0.03) | 1.00<br>(0.03)                | 1.01<br>(0.01)      | 1.02<br>(0.03) | 1.00<br>(0.02)                | 1.00<br>(0.00)           | 1.00<br>(0.03) | 1.00<br>(0.03)                |
| 2a (0,0,1)           | d | 1.09<br>(0.05)     | 1.12<br>(0.06) | 0.98<br>(0.02)                | 1.00<br>(0.00)          | 1.00<br>(0.03) | 1.00<br>(0.03)                | 1.20<br>(0.01)      | 1.71<br>(0.04) | 0.70<br>(0.01)                | 1.00<br>(0.00)           | 1.00<br>(0.03) | 1.01<br>(0.03)                |
| 2b (0,0,0)           | a | 1.01<br>(0.03)     | 1.01<br>(0.04) | 1.00<br>(0.02)                | 1.00<br>(0.00)          | 1.00<br>(0.03) | 1.00<br>(0.03)                | 1.00<br>(0.01)      | 1.00<br>(0.03) | 1.00<br>(0.02)                | 1.00<br>(0.00)           | 1.01<br>(0.03) | 1.00<br>(0.03)                |
| 2b (1,0,0)           | a | 1.00<br>(0.03)     | 1.03<br>(0.04) | 0.97<br>(0.02)                | 1.00<br>(0.00)          | 1.05<br>(0.03) | 0.95<br>(0.03)                | 1.00<br>(0.01)      | 1.11<br>(0.03) | 0.90<br>(0.02)                | 1.00<br>(0.00)           | 1.23<br>(0.04) | 0.82<br>(0.02)                |
| 2b (1,0,0)           | r | 1.01<br>(0.03)     | 1.01<br>(0.04) | 0.99<br>(0.02)                | 1.00<br>(0.00)          | 1.01<br>(0.03) | 0.99<br>(0.03)                | 1.00<br>(0.01)      | 1.00<br>(0.02) | 1.00<br>(0.02)                | 1.00<br>(0.00)           | 1.00<br>(0.03) | 1.00<br>(0.03)                |
| 2b (1,0,0)           | d | 1.00<br>(0.03)     | 1.05<br>(0.04) | 0.96<br>(0.02)                | 1.00<br>(0.00)          | 1.08<br>(0.04) | 0.93<br>(0.03)                | 1.00<br>(0.01)      | 1.32<br>(0.03) | 0.76<br>(0.02)                | 1.00<br>(0.00)           | 1.64<br>(0.05) | 0.61<br>(0.02)                |
| 2b (0,1,0)           | a | 1.00<br>(0.03)     | 1.01<br>(0.04) | 1.00<br>(0.02)                | 1.00<br>(0.00)          | 1.01<br>(0.03) | 0.99<br>(0.03)                | 1.00<br>(0.01)      | 1.00<br>(0.03) | 1.00<br>(0.02)                | 1.00<br>(0.00)           | 1.00<br>(0.03) | 1.00<br>(0.03)                |
| 2b (0,0,1)           | a | 1.00<br>(0.03)     | 1.04<br>(0.03) | 0.97<br>(0.02)                | 1.00<br>(0.00)          | 1.07<br>(0.03) | 0.94<br>(0.03)                | 1.00<br>(0.01)      | 1.34<br>(0.03) | 0.74<br>(0.02)                | 1.00<br>(0.00)           | 1.69<br>(0.05) | 0.59<br>(0.02)                |
| 2b (0,0,1)           | r | 1.01<br>(0.03)     | 1.01<br>(0.04) | 1.00<br>(0.02)                | 1.00<br>(0.00)          | 1.01<br>(0.03) | 1.00<br>(0.03)                | 1.00<br>(0.01)      | 1.05<br>(0.02) | 0.95<br>(0.02)                | 1.00<br>(0.00)           | 1.09<br>(0.04) | 0.92<br>(0.03)                |
| 2b (0,0,1)           | d | 1.00<br>(0.03)     | 1.02<br>(0.04) | 0.98<br>(0.02)                | 1.00<br>(0.00)          | 1.04<br>(0.03) | 0.97<br>(0.03)                | 1.00<br>(0.01)      | 1.11<br>(0.03) | 0.90<br>(0.02)                | 1.00<br>(0.00)           | 1.22<br>(0.04) | 0.82<br>(0.03)                |
| 2c (1,0,0)           | r | 2.28<br>(0.28)     | 2.28<br>(0.27) | 1.00<br>(0.02)                | 1.00<br>(0.00)          | 1.01<br>(0.03) | 0.99<br>(0.03)                | 2.31<br>(0.08)      | 2.33<br>(0.10) | 0.99<br>(0.02)                | 1.00<br>(0.00)           | 1.04<br>(0.03) | 0.96<br>(0.03)                |
| 2c (1,0,0)           | d | 2.24<br>(0.30)     | 2.26<br>(0.30) | 0.99<br>(0.03)                | 1.00<br>(0.00)          | 1.03<br>(0.03) | 0.98<br>(0.03)                | 2.22<br>(0.08)      | 2.39<br>(0.10) | 0.93<br>(0.02)                | 1.00<br>(0.00)           | 1.34<br>(0.04) | 0.75<br>(0.02)                |
| 2c (0,0,1)           | r | 2.31<br>(0.24)     | 2.32<br>(0.25) | 1.00<br>(0.02)                | 1.00<br>(0.00)          | 1.00<br>(0.03) | 1.00<br>(0.03)                | 2.32<br>(0.08)      | 2.33<br>(0.10) | 1.00<br>(0.03)                | 1.00<br>(0.00)           | 1.00<br>(0.03) | 1.00<br>(0.03)                |
| 2c (0,0,1)           | d | 2.33<br>(0.28)     | 2.33<br>(0.27) | 1.00<br>(0.03)                | 1.00<br>(0.00)          | 1.01<br>(0.03) | 1.00<br>(0.03)                | 2.31<br>(0.10)      | 2.49<br>(0.12) | 0.93<br>(0.02)                | 1.00<br>(0.00)           | 1.00<br>(0.03) | 1.00<br>(0.03)                |

Mean and standard deviation (SD) for  $l_{approx}$ ,  $l_{mean}$  and the ratio  $l_{approx}/l_{mean}$  are shown over 200 simulation runs for gene-environment (GxE) interaction and marginal association analyses for two sample sizes,  $n = 1000$  and  $10000$ . M, genotype model (a: additive, r: recessive, d: dominant).  $b_G$ ,  $b_{GE}$  and  $b_Z$  are effect size parameters of genotype, gene-environment interaction and covariate, respectively; 0 and 1 denote absence and presence of effect.

**S2 Table (continued). Comparison between  $l_{approx}$  and  $l_{mean}$  in quantitative phenotype simulations**

| Scenario             |   |  | GxE ( $n = 1000$ ) |                 |                               | Marginal ( $n = 1000$ ) |                |                               | GxE ( $n = 10000$ ) |                 |                               | Marginal ( $n = 10000$ ) |                |                               |
|----------------------|---|--|--------------------|-----------------|-------------------------------|-------------------------|----------------|-------------------------------|---------------------|-----------------|-------------------------------|--------------------------|----------------|-------------------------------|
| $(b_G, b_{GE}, b_Z)$ | M |  | $l_{approx}$       | $l_{mean}$      | $\frac{l_{approx}}{l_{mean}}$ | $l_{approx}$            | $l_{mean}$     | $\frac{l_{approx}}{l_{mean}}$ | $l_{approx}$        | $l_{mean}$      | $\frac{l_{approx}}{l_{mean}}$ | $l_{approx}$             | $l_{mean}$     | $\frac{l_{approx}}{l_{mean}}$ |
| 2d (1,0,0)           | r |  | 0.94<br>(0.26)     | 0.98<br>(0.18)  | 0.95<br>(0.07)                | 1.00<br>(0.00)          | 1.04<br>(0.03) | 0.96<br>(0.03)                | 0.99<br>(0.21)      | 1.01<br>(0.16)  | 0.97<br>(0.05)                | 1.00<br>(0.00)           | 1.03<br>(0.03) | 0.97<br>(0.03)                |
| 2d (1,0,0)           | d |  | 1.00<br>(0.33)     | 1.05<br>(0.24)  | 0.94<br>(0.08)                | 1.00<br>(0.00)          | 1.08<br>(0.03) | 0.93<br>(0.03)                | 0.99<br>(0.22)      | 1.49<br>(0.16)  | 0.66<br>(0.06)                | 1.00<br>(0.00)           | 1.99<br>(0.06) | 0.50<br>(0.01)                |
| 2d (0,0,1)           | r |  | 1.45<br>(0.79)     | 1.33<br>(0.56)  | 1.05<br>(0.11)                | 1.00<br>(0.00)          | 1.00<br>(0.03) | 1.00<br>(0.03)                | 10.77<br>(2.81)     | 8.19<br>(2.07)  | 1.31<br>(0.03)                | 1.00<br>(0.00)           | 1.00<br>(0.03) | 1.00<br>(0.03)                |
| 2d (0,0,1)           | d |  | 13.70<br>(3.61)    | 10.08<br>(2.55) | 1.36<br>(0.03)                | 1.00<br>(0.00)          | 1.01<br>(0.03) | 1.00<br>(0.03)                | 105.30<br>(8.54)    | 77.70<br>(6.50) | 1.36<br>(0.03)                | 1.00<br>(0.00)           | 1.00<br>(0.03) | 1.00<br>(0.03)                |
| 2e (0,0,0)           | a |  | 1.01<br>(0.21)     | 1.01<br>(0.20)  | 1.00<br>(0.02)                | 1.00<br>(0.00)          | 1.01<br>(0.03) | 1.00<br>(0.03)                | 1.02<br>(0.23)      | 1.02<br>(0.21)  | 1.00<br>(0.03)                | 1.00<br>(0.00)           | 1.00<br>(0.03) | 1.00<br>(0.03)                |
| 2e (1,0,0)           | a |  | 0.98<br>(0.22)     | 1.05<br>(0.21)  | 0.93<br>(0.04)                | 1.00<br>(0.00)          | 1.13<br>(0.04) | 0.89<br>(0.03)                | 1.01<br>(0.20)      | 2.02<br>(0.20)  | 0.50<br>(0.05)                | 1.00<br>(0.00)           | 3.02<br>(0.09) | 0.33<br>(0.01)                |
| 2e (1,0,0)           | r |  | 1.02<br>(0.25)     | 1.04<br>(0.24)  | 0.97<br>(0.03)                | 1.00<br>(0.00)          | 1.05<br>(0.03) | 0.96<br>(0.03)                | 0.99<br>(0.21)      | 1.22<br>(0.19)  | 0.80<br>(0.05)                | 1.00<br>(0.00)           | 1.47<br>(0.04) | 0.68<br>(0.02)                |
| 2e (1,0,0)           | d |  | 1.03<br>(0.25)     | 1.06<br>(0.23)  | 0.97<br>(0.03)                | 1.00<br>(0.00)          | 1.07<br>(0.03) | 0.94<br>(0.03)                | 0.99<br>(0.21)      | 1.38<br>(0.19)  | 0.71<br>(0.05)                | 1.00<br>(0.00)           | 1.79<br>(0.05) | 0.56<br>(0.02)                |
| 2e (0,1,0)           | a |  | 1.12<br>(0.25)     | 1.91<br>(0.27)  | 0.58<br>(0.06)                | 1.00<br>(0.00)          | 1.01<br>(0.03) | 1.00<br>(0.03)                | 9.48<br>(0.43)      | 16.61<br>(0.96) | 0.57<br>(0.02)                | 1.00<br>(0.00)           | 1.00<br>(0.03) | 1.00<br>(0.03)                |
| 2e (0,0,1)           | a |  | 1.19<br>(0.26)     | 2.59<br>(0.32)  | 0.46<br>(0.06)                | 1.00<br>(0.00)          | 1.00<br>(0.03) | 1.00<br>(0.03)                | 2.65<br>(0.29)      | 4.10<br>(0.47)  | 0.65<br>(0.04)                | 1.00<br>(0.00)           | 1.00<br>(0.03) | 1.00<br>(0.03)                |
| 2e (0,0,1)           | r |  | 1.00<br>(0.25)     | 1.01<br>(0.23)  | 0.99<br>(0.03)                | 1.00<br>(0.00)          | 1.01<br>(0.03) | 1.00<br>(0.03)                | 1.01<br>(0.20)      | 1.02<br>(0.19)  | 0.99<br>(0.03)                | 1.00<br>(0.00)           | 1.00<br>(0.03) | 1.00<br>(0.03)                |
| 2e (0,0,1)           | d |  | 1.04<br>(0.25)     | 1.07<br>(0.23)  | 0.97<br>(0.03)                | 1.00<br>(0.00)          | 1.01<br>(0.03) | 1.00<br>(0.03)                | 4.78<br>(0.37)      | 7.86<br>(0.59)  | 0.61<br>(0.03)                | 1.00<br>(0.00)           | 1.00<br>(0.03) | 1.00<br>(0.03)                |
| 3a (0,0,0)           | a |  | 1.01<br>(0.03)     | 1.01<br>(0.03)  | 1.00<br>(0.02)                | 1.01<br>(0.00)          | 1.01<br>(0.03) | 1.00<br>(0.03)                | 1.00<br>(0.01)      | 1.00<br>(0.02)  | 1.00<br>(0.02)                | 1.00<br>(0.00)           | 1.00<br>(0.03) | 1.00<br>(0.03)                |
| 3a (1,0,0)           | a |  | 1.01<br>(0.04)     | 1.09<br>(0.04)  | 0.92<br>(0.02)                | 1.01<br>(0.00)          | 1.17<br>(0.04) | 0.86<br>(0.03)                | 1.00<br>(0.01)      | 1.92<br>(0.04)  | 0.52<br>(0.01)                | 1.00<br>(0.00)           | 2.83<br>(0.08) | 0.35<br>(0.01)                |
| 3a (1,0,0)           | r |  | 1.01<br>(0.03)     | 1.01<br>(0.04)  | 1.00<br>(0.02)                | 1.01<br>(0.00)          | 1.01<br>(0.03) | 1.00<br>(0.03)                | 1.00<br>(0.01)      | 1.01<br>(0.02)  | 0.99<br>(0.02)                | 1.00<br>(0.00)           | 1.01<br>(0.03) | 0.99<br>(0.03)                |
| 3a (1,0,0)           | d |  | 1.01<br>(0.03)     | 1.03<br>(0.04)  | 0.98<br>(0.02)                | 1.01<br>(0.00)          | 1.05<br>(0.03) | 0.96<br>(0.03)                | 1.00<br>(0.01)      | 1.50<br>(0.03)  | 0.67<br>(0.01)                | 1.00<br>(0.00)           | 2.00<br>(0.06) | 0.50<br>(0.01)                |
| 3a (0,1,0)           | a |  | 1.01<br>(0.03)     | 1.01<br>(0.04)  | 1.00<br>(0.02)                | 1.01<br>(0.00)          | 1.01<br>(0.03) | 1.00<br>(0.03)                | 1.00<br>(0.01)      | 1.00<br>(0.02)  | 1.00<br>(0.02)                | 1.00<br>(0.00)           | 1.00<br>(0.03) | 1.00<br>(0.03)                |
| 3a (0,0,1)           | a |  | 1.21<br>(0.07)     | 1.27<br>(0.08)  | 0.95<br>(0.02)                | 1.01<br>(0.00)          | 1.01<br>(0.03) | 1.00<br>(0.03)                | 1.11<br>(0.02)      | 1.41<br>(0.04)  | 0.79<br>(0.02)                | 1.00<br>(0.00)           | 1.00<br>(0.03) | 1.00<br>(0.03)                |
| 3a (0,0,1)           | r |  | 1.04<br>(0.04)     | 1.04<br>(0.04)  | 1.00<br>(0.02)                | 1.01<br>(0.00)          | 1.01<br>(0.03) | 1.00<br>(0.03)                | 1.01<br>(0.01)      | 1.01<br>(0.03)  | 1.00<br>(0.02)                | 1.00<br>(0.00)           | 1.00<br>(0.03) | 1.00<br>(0.03)                |
| 3a (0,0,1)           | d |  | 1.21<br>(0.05)     | 1.26<br>(0.06)  | 0.96<br>(0.02)                | 1.01<br>(0.00)          | 1.01<br>(0.03) | 1.00<br>(0.03)                | 1.18<br>(0.02)      | 1.56<br>(0.04)  | 0.76<br>(0.02)                | 1.00<br>(0.00)           | 1.00<br>(0.03) | 1.00<br>(0.03)                |

Mean and standard deviation (SD) for  $l_{approx}$ ,  $l_{mean}$  and the ratio  $l_{approx}/l_{mean}$  are shown over 200 simulation runs for gene-environment (GxE) interaction and marginal association analyses for two sample sizes,  $n = 1000$  and  $10000$ . M, genotype model (a: additive, r: recessive, d: dominant).  $b_G$ ,  $b_{GE}$  and  $b_Z$  are effect size parameters of genotype, gene-environment interaction and covariate, respectively; 0 and 1 denote absence and presence of effect.

**S2 Table (continued). Comparison between  $l_{approx}$  and  $l_{mean}$  in quantitative phenotype simulations**

| Scenario             |   | GxE ( $n = 1000$ ) |                |                               | Marginal ( $n = 1000$ ) |                |                               | GxE ( $n = 10000$ ) |                |                               | Marginal ( $n = 10000$ ) |                |                               |
|----------------------|---|--------------------|----------------|-------------------------------|-------------------------|----------------|-------------------------------|---------------------|----------------|-------------------------------|--------------------------|----------------|-------------------------------|
| $(b_G, b_{GE}, b_Z)$ | M | $l_{approx}$       | $l_{mean}$     | $\frac{l_{approx}}{l_{mean}}$ | $l_{approx}$            | $l_{mean}$     | $\frac{l_{approx}}{l_{mean}}$ | $l_{approx}$        | $l_{mean}$     | $\frac{l_{approx}}{l_{mean}}$ | $l_{approx}$             | $l_{mean}$     | $\frac{l_{approx}}{l_{mean}}$ |
| 3b (0,0,0)           | a | 1.00<br>(0.02)     | 1.01<br>(0.03) | 1.00<br>(0.02)                | 1.00<br>(0.00)          | 1.00<br>(0.03) | 1.00<br>(0.03)                | 1.00<br>(0.01)      | 1.00<br>(0.02) | 1.00<br>(0.02)                | 1.00<br>(0.00)           | 1.00<br>(0.03) | 1.00<br>(0.03)                |
| 3b (1,0,0)           | a | 1.00<br>(0.02)     | 1.12<br>(0.03) | 0.90<br>(0.02)                | 1.00<br>(0.00)          | 1.23<br>(0.04) | 0.81<br>(0.03)                | 1.00<br>(0.01)      | 2.22<br>(0.05) | 0.45<br>(0.01)                | 1.00<br>(0.00)           | 3.44<br>(0.09) | 0.29<br>(0.01)                |
| 3b (1,0,0)           | r | 1.00<br>(0.02)     | 1.00<br>(0.03) | 1.00<br>(0.02)                | 1.00<br>(0.00)          | 1.01<br>(0.03) | 1.00<br>(0.03)                | 1.00<br>(0.01)      | 1.10<br>(0.02) | 0.91<br>(0.02)                | 1.00<br>(0.00)           | 1.20<br>(0.04) | 0.83<br>(0.03)                |
| 3b (1,0,0)           | d | 1.00<br>(0.02)     | 1.04<br>(0.03) | 0.96<br>(0.02)                | 1.00<br>(0.00)          | 1.08<br>(0.03) | 0.93<br>(0.03)                | 1.00<br>(0.01)      | 1.42<br>(0.03) | 0.70<br>(0.02)                | 1.00<br>(0.00)           | 1.84<br>(0.06) | 0.54<br>(0.02)                |
| 3b (0,1,0)           | a | 1.00<br>(0.02)     | 1.01<br>(0.03) | 1.00<br>(0.02)                | 1.00<br>(0.00)          | 1.01<br>(0.03) | 1.00<br>(0.03)                | 1.00<br>(0.01)      | 1.00<br>(0.02) | 1.00<br>(0.02)                | 1.00<br>(0.00)           | 1.00<br>(0.03) | 1.00<br>(0.03)                |
| 3b (0,0,1)           | a | 1.08<br>(0.03)     | 1.81<br>(0.08) | 0.60<br>(0.02)                | 1.00<br>(0.00)          | 1.63<br>(0.06) | 0.62<br>(0.02)                | 1.04<br>(0.01)      | 2.96<br>(0.11) | 0.35<br>(0.01)                | 1.00<br>(0.00)           | 3.41<br>(0.14) | 0.29<br>(0.01)                |
| 3b (0,0,1)           | r | 1.01<br>(0.02)     | 1.02<br>(0.03) | 0.99<br>(0.02)                | 1.00<br>(0.00)          | 1.01<br>(0.03) | 0.99<br>(0.03)                | 1.05<br>(0.01)      | 2.04<br>(0.06) | 0.52<br>(0.01)                | 1.00<br>(0.00)           | 2.35<br>(0.07) | 0.43<br>(0.01)                |
| 3b (0,0,1)           | d | 1.07<br>(0.02)     | 1.27<br>(0.04) | 0.84<br>(0.02)                | 1.00<br>(0.00)          | 1.26<br>(0.04) | 0.80<br>(0.03)                | 1.06<br>(0.01)      | 3.36<br>(0.06) | 0.32<br>(0.01)                | 1.00<br>(0.00)           | 3.80<br>(0.09) | 0.26<br>(0.01)                |
| 3c (0,0,0)           | a | 1.01<br>(0.00)     | 1.01<br>(0.02) | 1.00<br>(0.02)                | 1.00<br>(0.00)          | 1.00<br>(0.03) | 1.00<br>(0.03)                | 1.00<br>(0.00)      | 1.00<br>(0.02) | 1.00<br>(0.02)                | 1.00<br>(0.00)           | 0.99<br>(0.03) | 1.01<br>(0.03)                |
| 3c (1,0,0)           | a | 1.01<br>(0.00)     | 1.13<br>(0.02) | 0.89<br>(0.02)                | 1.00<br>(0.00)          | 1.25<br>(0.04) | 0.80<br>(0.03)                | 1.00<br>(0.00)      | 1.54<br>(0.04) | 0.65<br>(0.02)                | 1.00<br>(0.00)           | 2.09<br>(0.06) | 0.48<br>(0.01)                |
| 3c (1,0,0)           | r | 1.01<br>(0.00)     | 1.01<br>(0.02) | 1.00<br>(0.02)                | 1.00<br>(0.00)          | 1.01<br>(0.03) | 1.00<br>(0.03)                | 1.00<br>(0.00)      | 1.00<br>(0.02) | 1.00<br>(0.02)                | 1.00<br>(0.00)           | 1.00<br>(0.03) | 1.00<br>(0.03)                |
| 3c (1,0,0)           | d | 1.01<br>(0.00)     | 1.03<br>(0.02) | 0.98<br>(0.02)                | 1.00<br>(0.00)          | 1.05<br>(0.03) | 0.96<br>(0.03)                | 1.00<br>(0.00)      | 1.48<br>(0.03) | 0.68<br>(0.01)                | 1.00<br>(0.00)           | 1.96<br>(0.06) | 0.51<br>(0.02)                |
| 3c (0,1,0)           | a | 1.01<br>(0.00)     | 1.01<br>(0.02) | 1.00<br>(0.02)                | 1.00<br>(0.00)          | 1.01<br>(0.03) | 1.00<br>(0.03)                | 1.00<br>(0.00)      | 1.00<br>(0.03) | 1.00<br>(0.03)                | 1.00<br>(0.00)           | 1.00<br>(0.03) | 1.00<br>(0.03)                |
| 3c (0,0,1)           | a | 1.01<br>(0.01)     | 1.07<br>(0.03) | 0.94<br>(0.02)                | 1.00<br>(0.00)          | 1.06<br>(0.04) | 0.95<br>(0.03)                | 1.00<br>(0.00)      | 1.62<br>(0.04) | 0.62<br>(0.01)                | 1.00<br>(0.00)           | 1.55<br>(0.05) | 0.64<br>(0.02)                |
| 3c (0,0,1)           | r | 1.01<br>(0.00)     | 1.01<br>(0.02) | 0.99<br>(0.02)                | 1.00<br>(0.00)          | 1.01<br>(0.03) | 1.00<br>(0.03)                | 1.00<br>(0.00)      | 1.01<br>(0.02) | 1.00<br>(0.02)                | 1.00<br>(0.00)           | 1.00<br>(0.03) | 1.00<br>(0.03)                |
| 3c (0,0,1)           | d | 1.01<br>(0.00)     | 1.03<br>(0.02) | 0.98<br>(0.02)                | 1.00<br>(0.00)          | 1.03<br>(0.03) | 0.98<br>(0.03)                | 1.00<br>(0.00)      | 1.23<br>(0.03) | 0.82<br>(0.02)                | 1.00<br>(0.00)           | 1.22<br>(0.04) | 0.82<br>(0.03)                |
| 3d (0,0,0)           | a | 1.01<br>(0.02)     | 1.01<br>(0.03) | 1.00<br>(0.02)                | 1.00<br>(0.00)          | 1.01<br>(0.03) | 1.00<br>(0.03)                | 1.00<br>(0.01)      | 1.00<br>(0.02) | 1.00<br>(0.02)                | 1.00<br>(0.00)           | 1.00<br>(0.03) | 1.00<br>(0.03)                |
| 3d (1,0,0)           | a | 1.01<br>(0.03)     | 1.05<br>(0.04) | 0.96<br>(0.02)                | 1.00<br>(0.00)          | 1.09<br>(0.03) | 0.92<br>(0.03)                | 1.00<br>(0.01)      | 2.16<br>(0.05) | 0.46<br>(0.01)                | 1.00<br>(0.00)           | 3.33<br>(0.09) | 0.30<br>(0.01)                |
| 3d (1,0,0)           | r | 1.00<br>(0.03)     | 1.03<br>(0.04) | 0.98<br>(0.02)                | 1.00<br>(0.00)          | 1.05<br>(0.03) | 0.96<br>(0.03)                | 1.00<br>(0.01)      | 1.15<br>(0.03) | 0.87<br>(0.02)                | 1.00<br>(0.00)           | 1.29<br>(0.04) | 0.78<br>(0.02)                |
| 3d (1,0,0)           | d | 1.00<br>(0.02)     | 1.03<br>(0.03) | 0.98<br>(0.02)                | 1.00<br>(0.00)          | 1.05<br>(0.03) | 0.95<br>(0.03)                | 1.00<br>(0.01)      | 1.50<br>(0.03) | 0.67<br>(0.01)                | 1.00<br>(0.00)           | 2.00<br>(0.05) | 0.50<br>(0.01)                |
| 3d (0,1,0)           | a | 1.00<br>(0.03)     | 1.01<br>(0.03) | 1.00<br>(0.02)                | 1.00<br>(0.00)          | 1.01<br>(0.03) | 1.00<br>(0.03)                | 1.00<br>(0.01)      | 1.00<br>(0.03) | 1.00<br>(0.02)                | 1.00<br>(0.00)           | 1.00<br>(0.03) | 1.01<br>(0.03)                |
| 3d (0,0,1)           | a | 1.10<br>(0.03)     | 1.42<br>(0.06) | 0.77<br>(0.02)                | 1.00<br>(0.00)          | 1.37<br>(0.05) | 0.74<br>(0.03)                | 1.09<br>(0.01)      | 4.20<br>(0.10) | 0.26<br>(0.01)                | 1.00<br>(0.00)           | 4.55<br>(0.12) | 0.22<br>(0.01)                |
| 3d (0,0,1)           | r | 1.06<br>(0.03)     | 1.14<br>(0.04) | 0.94<br>(0.02)                | 1.00<br>(0.00)          | 1.11<br>(0.03) | 0.91<br>(0.03)                | 1.01<br>(0.01)      | 1.04<br>(0.02) | 0.97<br>(0.02)                | 1.00<br>(0.00)           | 1.04<br>(0.03) | 0.96<br>(0.03)                |
| 3d (0,0,1)           | d | 1.07<br>(0.03)     | 1.18<br>(0.04) | 0.91<br>(0.02)                | 1.00<br>(0.00)          | 1.15<br>(0.04) | 0.88<br>(0.03)                | 1.07<br>(0.01)      | 2.23<br>(0.05) | 0.48<br>(0.01)                | 1.00<br>(0.00)           | 2.57<br>(0.08) | 0.39<br>(0.01)                |

Mean and standard deviation (SD) for  $l_{approx}$ ,  $l_{mean}$  and the ratio  $l_{approx}/l_{mean}$  are shown over 200 simulation runs for gene-environment (GxE) interaction and marginal association analyses for two sample sizes,  $n = 1000$  and  $10000$ . M, genotype model (a: additive, r: recessive, d: dominant).  $b_G$ ,  $b_{GE}$  and  $b_Z$  are effect size parameters of genotype, gene-environment interaction and covariate, respectively; 0 and 1 denote absence and presence of effect.

**S2 Table (continued). Comparison between  $l_{approx}$  and  $l_{mean}$  in quantitative phenotype simulations**

| Scenario             |         | GxE ( $n = 1000$ ) |                |                               | Marginal ( $n = 1000$ ) |                |                               | GxE ( $n = 10000$ ) |                |                               | Marginal ( $n = 10000$ ) |                |                               |                |
|----------------------|---------|--------------------|----------------|-------------------------------|-------------------------|----------------|-------------------------------|---------------------|----------------|-------------------------------|--------------------------|----------------|-------------------------------|----------------|
| $(b_G, b_{GE}, b_Z)$ | M       | $l_{approx}$       | $l_{mean}$     | $\frac{l_{approx}}{l_{mean}}$ | $l_{approx}$            | $l_{mean}$     | $\frac{l_{approx}}{l_{mean}}$ | $l_{approx}$        | $l_{mean}$     | $\frac{l_{approx}}{l_{mean}}$ | $l_{approx}$             | $l_{mean}$     | $\frac{l_{approx}}{l_{mean}}$ |                |
| 4a                   | (0,0,0) | a                  | 1.01<br>(0.03) | 1.02<br>(0.07)                | 0.99<br>(0.06)          | 1.00<br>(0.00) | 1.02<br>(0.09)                | 0.99<br>(0.09)      | 1.00<br>(0.01) | 1.02<br>(0.06)                | 0.99<br>(0.06)           | 1.00<br>(0.00) | 1.02<br>(0.09)                | 0.99<br>(0.09) |
| 4a                   | (1,0,0) | a                  | 1.01<br>(0.03) | 1.48<br>(0.13)                | 0.69<br>(0.06)          | 1.00<br>(0.00) | 1.92<br>(0.22)                | 0.53<br>(0.06)      | 1.00<br>(0.01) | 5.04<br>(0.34)                | 0.20<br>(0.01)           | 1.00<br>(0.00) | 9.08<br>(0.68)                | 0.11<br>(0.01) |
| 4a                   | (1,0,0) | r                  | 1.00<br>(0.03) | 1.08<br>(0.09)                | 0.93<br>(0.07)          | 1.00<br>(0.00) | 1.16<br>(0.13)                | 0.88<br>(0.10)      | 1.00<br>(0.01) | 1.02<br>(0.08)                | 0.99<br>(0.07)           | 1.00<br>(0.00) | 1.05<br>(0.12)                | 0.97<br>(0.10) |
| 4a                   | (1,0,0) | d                  | 1.01<br>(0.03) | 1.43<br>(0.12)                | 0.71<br>(0.06)          | 1.00<br>(0.00) | 1.84<br>(0.23)                | 0.55<br>(0.07)      | 1.00<br>(0.01) | 4.29<br>(0.32)                | 0.23<br>(0.02)           | 1.00<br>(0.00) | 7.57<br>(0.63)                | 0.13<br>(0.01) |
| 4a                   | (0,1,0) | a                  | 1.01<br>(0.03) | 1.02<br>(0.08)                | 1.00<br>(0.07)          | 1.00<br>(0.00) | 1.02<br>(0.10)                | 0.99<br>(0.09)      | 1.00<br>(0.01) | 1.00<br>(0.06)                | 1.01<br>(0.06)           | 1.00<br>(0.00) | 1.00<br>(0.09)                | 1.01<br>(0.09) |
| 4a                   | (0,0,1) | a                  | 1.06<br>(0.05) | 1.13<br>(0.10)                | 0.94<br>(0.07)          | 1.00<br>(0.00) | 1.00<br>(0.09)                | 1.01<br>(0.09)      | 1.17<br>(0.02) | 4.42<br>(0.34)                | 0.27<br>(0.02)           | 1.00<br>(0.00) | 1.00<br>(0.09)                | 1.01<br>(0.09) |
| 4a                   | (0,0,1) | r                  | 1.12<br>(0.05) | 1.28<br>(0.12)                | 0.88<br>(0.06)          | 1.00<br>(0.00) | 1.02<br>(0.09)                | 1.00<br>(0.09)      | 1.05<br>(0.01) | 1.46<br>(0.13)                | 0.72<br>(0.07)           | 1.00<br>(0.00) | 1.01<br>(0.10)                | 1.00<br>(0.09) |
| 4a                   | (0,0,1) | d                  | 1.16<br>(0.05) | 1.48<br>(0.15)                | 0.80<br>(0.07)          | 1.00<br>(0.00) | 1.01<br>(0.09)                | 1.00<br>(0.09)      | 1.18<br>(0.02) | 4.57<br>(0.34)                | 0.26<br>(0.02)           | 1.00<br>(0.00) | 1.00<br>(0.09)                | 1.00<br>(0.09) |
| 4b                   | (0,0,0) | a                  | 1.00<br>(0.03) | 1.00<br>(0.04)                | 1.00<br>(0.02)          | 1.00<br>(0.00) | 1.00<br>(0.03)                | 1.00<br>(0.03)      | 1.00<br>(0.01) | 1.00<br>(0.02)                | 1.00<br>(0.02)           | 1.00<br>(0.00) | 1.00<br>(0.03)                | 1.00<br>(0.03) |
| 4b                   | (1,0,0) | a                  | 1.00<br>(0.03) | 1.03<br>(0.04)                | 0.98<br>(0.02)          | 1.00<br>(0.00) | 1.05<br>(0.03)                | 0.96<br>(0.03)      | 1.00<br>(0.01) | 2.24<br>(0.05)                | 0.45<br>(0.01)           | 1.00<br>(0.00) | 3.49<br>(0.08)                | 0.29<br>(0.01) |
| 4b                   | (1,0,0) | r                  | 1.00<br>(0.03) | 1.00<br>(0.04)                | 1.00<br>(0.02)          | 1.00<br>(0.00) | 1.00<br>(0.03)                | 1.00<br>(0.03)      | 1.00<br>(0.01) | 1.00<br>(0.02)                | 1.00<br>(0.02)           | 1.00<br>(0.00) | 1.00<br>(0.03)                | 1.00<br>(0.03) |
| 4b                   | (1,0,0) | d                  | 1.00<br>(0.03) | 1.04<br>(0.04)                | 0.97<br>(0.02)          | 1.00<br>(0.00) | 1.06<br>(0.03)                | 0.94<br>(0.03)      | 1.00<br>(0.01) | 1.10<br>(0.03)                | 0.91<br>(0.02)           | 1.00<br>(0.00) | 1.18<br>(0.04)                | 0.85<br>(0.03) |
| 4b                   | (0,1,0) | a                  | 1.01<br>(0.03) | 1.01<br>(0.04)                | 1.00<br>(0.02)          | 1.00<br>(0.00) | 1.01<br>(0.03)                | 1.00<br>(0.03)      | 1.00<br>(0.01) | 1.00<br>(0.03)                | 1.00<br>(0.02)           | 1.00<br>(0.00) | 1.00<br>(0.03)                | 1.00<br>(0.03) |
| 4b                   | (0,0,1) | a                  | 1.04<br>(0.04) | 1.05<br>(0.05)                | 0.99<br>(0.02)          | 1.00<br>(0.00) | 1.01<br>(0.03)                | 1.00<br>(0.03)      | 1.26<br>(0.02) | 2.12<br>(0.06)                | 0.59<br>(0.01)           | 1.00<br>(0.00) | 1.00<br>(0.03)                | 1.00<br>(0.03) |
| 4b                   | (0,0,1) | r                  | 1.10<br>(0.05) | 1.11<br>(0.06)                | 0.99<br>(0.02)          | 1.00<br>(0.00) | 1.01<br>(0.03)                | 0.99<br>(0.03)      | 1.01<br>(0.01) | 1.02<br>(0.03)                | 0.99<br>(0.02)           | 1.00<br>(0.00) | 1.00<br>(0.03)                | 1.00<br>(0.03) |
| 4b                   | (0,0,1) | d                  | 1.04<br>(0.04) | 1.05<br>(0.04)                | 0.99<br>(0.02)          | 1.00<br>(0.00) | 1.01<br>(0.03)                | 1.00<br>(0.03)      | 1.12<br>(0.02) | 1.44<br>(0.04)                | 0.78<br>(0.02)           | 1.00<br>(0.00) | 1.00<br>(0.03)                | 1.00<br>(0.03) |
| 4c                   | (0,0,0) | a                  | 1.00<br>(0.03) | 1.00<br>(0.07)                | 1.01<br>(0.06)          | 1.00<br>(0.00) | 1.00<br>(0.08)                | 1.01<br>(0.08)      | 1.00<br>(0.01) | 1.00<br>(0.06)                | 1.00<br>(0.05)           | 1.00<br>(0.00) | 1.00<br>(0.08)                | 1.00<br>(0.08) |
| 4c                   | (1,0,0) | a                  | 1.01<br>(0.03) | 1.47<br>(0.12)                | 0.69<br>(0.05)          | 1.00<br>(0.00) | 1.92<br>(0.21)                | 0.53<br>(0.06)      | 1.00<br>(0.01) | 2.09<br>(0.17)                | 0.48<br>(0.04)           | 1.00<br>(0.00) | 3.18<br>(0.33)                | 0.32<br>(0.03) |
| 4c                   | (1,0,0) | r                  | 1.01<br>(0.03) | 1.20<br>(0.09)                | 0.84<br>(0.05)          | 1.00<br>(0.00) | 1.40<br>(0.14)                | 0.73<br>(0.07)      | 1.00<br>(0.01) | 1.00<br>(0.06)                | 1.00<br>(0.06)           | 1.00<br>(0.00) | 1.00<br>(0.08)                | 1.01<br>(0.08) |
| 4c                   | (1,0,0) | d                  | 1.01<br>(0.03) | 1.21<br>(0.09)                | 0.83<br>(0.06)          | 1.00<br>(0.00) | 1.42<br>(0.15)                | 0.72<br>(0.07)      | 1.00<br>(0.01) | 3.66<br>(0.24)                | 0.27<br>(0.02)           | 1.00<br>(0.00) | 6.32<br>(0.48)                | 0.16<br>(0.01) |
| 4c                   | (0,1,0) | a                  | 1.00<br>(0.03) | 1.00<br>(0.07)                | 1.00<br>(0.06)          | 1.00<br>(0.00) | 1.01<br>(0.08)                | 1.00<br>(0.08)      | 1.00<br>(0.01) | 1.00<br>(0.06)                | 1.00<br>(0.06)           | 1.00<br>(0.00) | 1.00<br>(0.08)                | 1.01<br>(0.08) |
| 4c                   | (0,0,1) | a                  | 1.04<br>(0.04) | 1.09<br>(0.08)                | 0.96<br>(0.06)          | 1.00<br>(0.00) | 1.02<br>(0.08)                | 0.99<br>(0.07)      | 1.33<br>(0.02) | 8.01<br>(0.46)                | 0.17<br>(0.01)           | 1.00<br>(0.00) | 1.00<br>(0.08)                | 1.01<br>(0.08) |
| 4c                   | (0,0,1) | r                  | 1.03<br>(0.04) | 1.05<br>(0.08)                | 0.99<br>(0.06)          | 1.00<br>(0.00) | 1.01<br>(0.08)                | 1.00<br>(0.08)      | 1.00<br>(0.01) | 1.00<br>(0.06)                | 1.00<br>(0.06)           | 1.00<br>(0.00) | 1.00<br>(0.08)                | 1.01<br>(0.08) |
| 4c                   | (0,0,1) | d                  | 1.09<br>(0.05) | 1.19<br>(0.10)                | 0.92<br>(0.06)          | 1.00<br>(0.00) | 1.02<br>(0.08)                | 1.00<br>(0.08)      | 1.07<br>(0.02) | 1.80<br>(0.15)                | 0.60<br>(0.05)           | 1.00<br>(0.00) | 1.01<br>(0.08)                | 1.00<br>(0.07) |

Mean and standard deviation (SD) for  $l_{approx}$ ,  $l_{mean}$  and the ratio  $l_{approx}/l_{mean}$  are shown over 200 simulation runs for gene-environment (GxE) interaction and marginal association analyses for two sample sizes,  $n = 1000$  and  $10000$ . M, genotype model (a: additive, r: recessive, d: dominant).  $b_G$ ,  $b_{GE}$  and  $b_Z$  are effect size parameters of genotype, gene-environment interaction and covariate, respectively; 0 and 1 denote absence and presence of effect.
