# Supplementary material for: Quick assessment for systematic test statistic inflation/deflation due to null model misspecifications in genome-wide environment interaction studies
Source: PubMed Central journal article supplement (PMC6638962; doi:10.1371/journal.pone.0219825), 2019-07-18
Supplement: pone.0219825.s010.pdf [file pone.0219825.s010.pdf]

**S3 Table. Comparison between  $l_{approx}$  and  $l_{mean}$  in binary phenotype simulations**

| Scenario             |   | GxE ( $n = 1000$ ) |                |                               | Marginal ( $n = 1000$ ) |                |                               | GxE ( $n = 10000$ ) |                |                               | Marginal ( $n = 10000$ ) |                |                               |
|----------------------|---|--------------------|----------------|-------------------------------|-------------------------|----------------|-------------------------------|---------------------|----------------|-------------------------------|--------------------------|----------------|-------------------------------|
| $(b_G, b_{GE}, b_Z)$ | M | $l_{approx}$       | $l_{mean}$     | $\frac{l_{approx}}{l_{mean}}$ | $l_{approx}$            | $l_{mean}$     | $\frac{l_{approx}}{l_{mean}}$ | $l_{approx}$        | $l_{mean}$     | $\frac{l_{approx}}{l_{mean}}$ | $l_{approx}$             | $l_{mean}$     | $\frac{l_{approx}}{l_{mean}}$ |
| Base (1,0,0)         | r | 1.00<br>(0.00)     | 1.00<br>(0.02) | 1.00<br>(0.02)                | 1.00<br>(0.00)          | 1.00<br>(0.03) | 1.00<br>(0.03)                | 1.00<br>(0.00)      | 1.00<br>(0.02) | 1.00<br>(0.02)                | 1.00<br>(0.00)           | 1.00<br>(0.03) | 1.00<br>(0.03)                |
| Base (1,0,0)         | d | 1.00<br>(0.02)     | 1.01<br>(0.03) | 0.99<br>(0.02)                | 1.00<br>(0.00)          | 1.02<br>(0.03) | 0.98<br>(0.03)                | 1.00<br>(0.00)      | 1.00<br>(0.02) | 1.00<br>(0.02)                | 1.00<br>(0.00)           | 1.00<br>(0.03) | 1.00<br>(0.03)                |
| Base (0,0,1)         | r | 1.00<br>(0.00)     | 1.01<br>(0.02) | 1.00<br>(0.02)                | 1.00<br>(0.00)          | 1.01<br>(0.03) | 1.00<br>(0.03)                | 1.00<br>(0.00)      | 1.00<br>(0.02) | 1.00<br>(0.02)                | 1.00<br>(0.00)           | 1.00<br>(0.03) | 1.00<br>(0.03)                |
| Base (0,0,1)         | d | 1.01<br>(0.01)     | 1.02<br>(0.02) | 0.99<br>(0.02)                | 1.00<br>(0.00)          | 1.00<br>(0.03) | 1.00<br>(0.03)                | 1.01<br>(0.00)      | 1.01<br>(0.02) | 1.00<br>(0.02)                | 1.00<br>(0.00)           | 1.00<br>(0.03) | 1.00<br>(0.03)                |
| 1a (1,0,0)           | r | 1.00<br>(0.00)     | 1.01<br>(0.03) | 1.00<br>(0.02)                | 1.00<br>(0.00)          | 1.01<br>(0.04) | 1.00<br>(0.04)                | 1.00<br>(0.00)      | 1.00<br>(0.02) | 1.00<br>(0.02)                | 1.00<br>(0.00)           | 1.01<br>(0.04) | 0.99<br>(0.04)                |
| 1a (1,0,0)           | d | 1.01<br>(0.01)     | 1.02<br>(0.03) | 0.99<br>(0.02)                | 1.00<br>(0.00)          | 1.02<br>(0.03) | 0.98<br>(0.03)                | 1.00<br>(0.00)      | 1.00<br>(0.02) | 1.00<br>(0.02)                | 1.00<br>(0.00)           | 1.00<br>(0.03) | 1.00<br>(0.03)                |
| 1a (0,0,1)           | r | 1.01<br>(0.01)     | 1.01<br>(0.02) | 1.00<br>(0.02)                | 1.00<br>(0.00)          | 1.00<br>(0.03) | 1.00<br>(0.03)                | 1.00<br>(0.00)      | 1.00<br>(0.02) | 1.00<br>(0.02)                | 1.00<br>(0.00)           | 1.00<br>(0.03) | 1.00<br>(0.03)                |
| 1a (0,0,1)           | d | 1.02<br>(0.02)     | 1.02<br>(0.03) | 0.99<br>(0.02)                | 1.00<br>(0.00)          | 1.00<br>(0.03) | 1.00<br>(0.03)                | 1.00<br>(0.00)      | 1.00<br>(0.02) | 1.00<br>(0.02)                | 1.00<br>(0.00)           | 1.00<br>(0.03) | 1.00<br>(0.03)                |
| 1b (0,0,0)           | a | 1.00<br>(0.00)     | 1.00<br>(0.02) | 1.00<br>(0.02)                | 1.00<br>(0.00)          | 1.00<br>(0.03) | 1.00<br>(0.03)                | 1.00<br>(0.00)      | 1.00<br>(0.02) | 1.00<br>(0.02)                | 1.00<br>(0.00)           | 1.00<br>(0.03) | 1.00<br>(0.03)                |
| 1b (1,0,0)           | a | 1.00<br>(0.01)     | 1.02<br>(0.03) | 0.98<br>(0.02)                | 1.00<br>(0.00)          | 1.03<br>(0.04) | 0.97<br>(0.03)                | 1.00<br>(0.00)      | 1.00<br>(0.02) | 0.99<br>(0.02)                | 1.00<br>(0.00)           | 1.01<br>(0.03) | 0.99<br>(0.03)                |
| 1b (1,0,0)           | r | 1.00<br>(0.01)     | 1.01<br>(0.02) | 1.00<br>(0.02)                | 1.00<br>(0.00)          | 1.01<br>(0.03) | 0.99<br>(0.03)                | 1.00<br>(0.00)      | 1.00<br>(0.02) | 1.00<br>(0.02)                | 1.00<br>(0.00)           | 1.00<br>(0.03) | 1.00<br>(0.03)                |
| 1b (1,0,0)           | d | 1.01<br>(0.02)     | 1.02<br>(0.02) | 0.99<br>(0.02)                | 1.00<br>(0.00)          | 1.02<br>(0.03) | 0.98<br>(0.03)                | 1.00<br>(0.00)      | 1.01<br>(0.02) | 0.99<br>(0.02)                | 1.00<br>(0.00)           | 1.01<br>(0.04) | 0.99<br>(0.03)                |
| 1b (0,1,0)           | a | 1.00<br>(0.01)     | 1.01<br>(0.02) | 1.00<br>(0.02)                | 1.00<br>(0.00)          | 1.00<br>(0.03) | 1.00<br>(0.03)                | 1.00<br>(0.00)      | 1.00<br>(0.02) | 1.00<br>(0.02)                | 1.00<br>(0.00)           | 1.00<br>(0.03) | 1.00<br>(0.03)                |
| 1b (0,0,1)           | a | 1.00<br>(0.01)     | 1.01<br>(0.03) | 0.99<br>(0.02)                | 1.00<br>(0.00)          | 1.02<br>(0.03) | 0.98<br>(0.03)                | 1.00<br>(0.00)      | 1.01<br>(0.02) | 0.99<br>(0.02)                | 1.00<br>(0.00)           | 1.02<br>(0.03) | 0.99<br>(0.03)                |
| 1b (0,0,1)           | r | 1.00<br>(0.00)     | 1.01<br>(0.02) | 1.00<br>(0.02)                | 1.00<br>(0.00)          | 1.01<br>(0.03) | 1.00<br>(0.03)                | 1.00<br>(0.00)      | 1.01<br>(0.02) | 0.99<br>(0.02)                | 1.00<br>(0.00)           | 1.01<br>(0.03) | 0.99<br>(0.03)                |
| 1b (0,0,1)           | d | 1.00<br>(0.01)     | 1.01<br>(0.03) | 1.00<br>(0.02)                | 1.00<br>(0.00)          | 1.01<br>(0.03) | 0.99<br>(0.03)                | 1.00<br>(0.00)      | 1.00<br>(0.02) | 1.00<br>(0.02)                | 1.00<br>(0.00)           | 1.01<br>(0.04) | 0.99<br>(0.03)                |
| 1c (0,0,0)           | a | 1.00<br>(0.00)     | 1.01<br>(0.02) | 1.00<br>(0.02)                | 1.00<br>(0.00)          | 1.00<br>(0.03) | 1.00<br>(0.03)                | 1.00<br>(0.00)      | 1.00<br>(0.02) | 1.00<br>(0.02)                | 1.00<br>(0.00)           | 1.00<br>(0.03) | 1.00<br>(0.03)                |
| 1c (1,0,0)           | a | 1.00<br>(0.01)     | 1.02<br>(0.02) | 0.99<br>(0.02)                | 1.00<br>(0.00)          | 1.02<br>(0.03) | 0.98<br>(0.03)                | 1.00<br>(0.00)      | 1.00<br>(0.02) | 1.00<br>(0.02)                | 1.00<br>(0.00)           | 1.00<br>(0.03) | 1.00<br>(0.03)                |
| 1c (1,0,0)           | r | 1.00<br>(0.00)     | 1.00<br>(0.02) | 1.00<br>(0.02)                | 1.00<br>(0.00)          | 1.00<br>(0.03) | 1.00<br>(0.03)                | 1.00<br>(0.00)      | 1.00<br>(0.02) | 1.00<br>(0.02)                | 1.00<br>(0.00)           | 1.00<br>(0.03) | 1.00<br>(0.03)                |
| 1c (1,0,0)           | d | 1.00<br>(0.01)     | 1.01<br>(0.03) | 0.99<br>(0.02)                | 1.00<br>(0.00)          | 1.02<br>(0.03) | 0.98<br>(0.03)                | 1.00<br>(0.01)      | 1.00<br>(0.02) | 1.00<br>(0.02)                | 1.00<br>(0.00)           | 1.00<br>(0.03) | 1.00<br>(0.03)                |
| 1c (0,1,0)           | a | 1.00<br>(0.01)     | 1.00<br>(0.03) | 1.00<br>(0.02)                | 1.00<br>(0.00)          | 1.00<br>(0.03) | 1.00<br>(0.03)                | 1.00<br>(0.00)      | 1.00<br>(0.02) | 1.00<br>(0.02)                | 1.00<br>(0.00)           | 1.00<br>(0.03) | 1.00<br>(0.03)                |
| 1c (0,0,1)           | a | 1.00<br>(0.01)     | 1.01<br>(0.03) | 0.99<br>(0.02)                | 1.00<br>(0.00)          | 1.02<br>(0.03) | 0.99<br>(0.03)                | 1.00<br>(0.00)      | 1.00<br>(0.02) | 1.00<br>(0.02)                | 1.00<br>(0.00)           | 1.00<br>(0.03) | 1.00<br>(0.03)                |
| 1c (0,0,1)           | r | 1.00<br>(0.00)     | 1.00<br>(0.02) | 1.00<br>(0.02)                | 1.00<br>(0.00)          | 1.01<br>(0.03) | 1.00<br>(0.03)                | 1.00<br>(0.00)      | 1.00<br>(0.02) | 1.00<br>(0.02)                | 1.00<br>(0.00)           | 1.00<br>(0.03) | 1.00<br>(0.03)                |
| 1c (0,0,1)           | d | 1.00<br>(0.01)     | 1.01<br>(0.03) | 1.00<br>(0.03)                | 1.00<br>(0.00)          | 1.01<br>(0.03) | 0.99<br>(0.03)                | 1.00<br>(0.00)      | 1.00<br>(0.02) | 1.00<br>(0.02)                | 1.00<br>(0.00)           | 1.01<br>(0.03) | 0.99<br>(0.03)                |

Mean and standard deviation (SD) for  $l_{approx}$ ,  $l_{mean}$  and the ratio  $l_{approx}/l_{mean}$  are shown over 200 simulation runs for gene-environment (GxE) interaction and marginal association analyses for two sample sizes,  $n = 1000$  and  $10000$ . M, genotype model (a: additive, r: recessive, d: dominant).  $b_G$ ,  $b_{GE}$  and  $b_Z$  are effect size parameters of genotype, gene-environment interaction and covariate, respectively; 0 and 1 denote absence and presence of effect.

**S3 Table (continued). Comparison between  $l_{approx}$  and  $l_{mean}$  in binary phenotype simulations**

| Scenario             |         | GxE ( $n = 1000$ ) |            |                               | Marginal ( $n = 1000$ ) |            |                               | GxE ( $n = 10000$ ) |            |                               | Marginal ( $n = 10000$ ) |            |                               |
|----------------------|---------|--------------------|------------|-------------------------------|-------------------------|------------|-------------------------------|---------------------|------------|-------------------------------|--------------------------|------------|-------------------------------|
| $(b_G, b_{GE}, b_Z)$ | M       | $l_{approx}$       | $l_{mean}$ | $\frac{l_{approx}}{l_{mean}}$ | $l_{approx}$            | $l_{mean}$ | $\frac{l_{approx}}{l_{mean}}$ | $l_{approx}$        | $l_{mean}$ | $\frac{l_{approx}}{l_{mean}}$ | $l_{approx}$             | $l_{mean}$ | $\frac{l_{approx}}{l_{mean}}$ |
| 1d                   | (0,0,0) | a                  | 1.00       | 1.01                          | 1.00                    | 1.00       | 1.01                          | 1.00                | 1.00       | 1.00                          | 1.00                     | 1.00       | 1.00                          |
|                      |         |                    | (0.00)     | (0.02)                        | (0.02)                  | (0.00)     | (0.03)                        | (0.03)              | (0.00)     | (0.02)                        | (0.02)                   | (0.00)     | (0.03)                        |
| 1d                   | (1,0,0) | a                  | 1.00       | 1.01                          | 1.00                    | 1.00       | 1.01                          | 0.99                | 1.00       | 1.00                          | 1.00                     | 1.00       | 1.00                          |
|                      |         |                    | (0.00)     | (0.02)                        | (0.02)                  | (0.00)     | (0.03)                        | (0.03)              | (0.00)     | (0.02)                        | (0.02)                   | (0.00)     | (0.03)                        |
| 1d                   | (1,0,0) | r                  | 1.00       | 1.00                          | 1.00                    | 1.00       | 1.00                          | 1.00                | 1.00       | 1.00                          | 1.00                     | 1.00       | 1.00                          |
|                      |         |                    | (0.00)     | (0.02)                        | (0.02)                  | (0.00)     | (0.03)                        | (0.03)              | (0.00)     | (0.02)                        | (0.02)                   | (0.00)     | (0.03)                        |
| 1d                   | (1,0,0) | d                  | 1.00       | 1.01                          | 0.99                    | 1.00       | 1.02                          | 0.98                | 1.00       | 1.00                          | 1.00                     | 1.00       | 1.00                          |
|                      |         |                    | (0.02)     | (0.03)                        | (0.02)                  | (0.00)     | (0.03)                        | (0.03)              | (0.01)     | (0.02)                        | (0.02)                   | (0.00)     | (0.03)                        |
| 1d                   | (0,1,0) | a                  | 1.00       | 1.00                          | 1.00                    | 1.00       | 0.99                          | 1.01                | 1.00       | 1.00                          | 1.00                     | 1.00       | 1.00                          |
|                      |         |                    | (0.02)     | (0.03)                        | (0.02)                  | (0.00)     | (0.03)                        | (0.03)              | (0.01)     | (0.02)                        | (0.02)                   | (0.00)     | (0.03)                        |
| 1d                   | (0,0,1) | a                  | 1.02       | 1.03                          | 0.99                    | 1.00       | 1.00                          | 1.00                | 1.01       | 1.01                          | 1.00                     | 1.00       | 1.00                          |
|                      |         |                    | (0.02)     | (0.03)                        | (0.02)                  | (0.00)     | (0.03)                        | (0.04)              | (0.00)     | (0.02)                        | (0.02)                   | (0.00)     | (0.03)                        |
| 1d                   | (0,0,1) | r                  | 1.00       | 1.00                          | 1.00                    | 1.00       | 1.00                          | 1.00                | 1.00       | 1.00                          | 1.00                     | 1.00       | 1.00                          |
|                      |         |                    | (0.00)     | (0.02)                        | (0.02)                  | (0.00)     | (0.03)                        | (0.03)              | (0.00)     | (0.02)                        | (0.02)                   | (0.00)     | (0.03)                        |
| 1d                   | (0,0,1) | d                  | 1.01       | 1.03                          | 0.99                    | 1.00       | 1.00                          | 1.00                | 1.01       | 1.01                          | 1.00                     | 1.00       | 1.00                          |
|                      |         |                    | (0.02)     | (0.03)                        | (0.02)                  | (0.00)     | (0.03)                        | (0.03)              | (0.01)     | (0.02)                        | (0.02)                   | (0.00)     | (0.03)                        |
| 2a                   | (1,0,0) | r                  | 1.00       | 1.01                          | 1.00                    | 1.00       | 1.01                          | 1.00                | 1.00       | 1.01                          | 0.99                     | 1.00       | 1.03                          |
|                      |         |                    | (0.00)     | (0.02)                        | (0.02)                  | (0.00)     | (0.03)                        | (0.03)              | (0.00)     | (0.02)                        | (0.02)                   | (0.00)     | (0.03)                        |
| 2a                   | (1,0,0) | d                  | 1.00       | 1.01                          | 1.00                    | 1.00       | 1.01                          | 0.99                | 1.00       | 1.00                          | 1.00                     | 1.00       | 1.00                          |
|                      |         |                    | (0.00)     | (0.02)                        | (0.02)                  | (0.00)     | (0.03)                        | (0.03)              | (0.00)     | (0.02)                        | (0.02)                   | (0.00)     | (0.03)                        |
| 2a                   | (0,0,1) | r                  | 1.00       | 1.01                          | 1.00                    | 1.00       | 1.01                          | 1.00                | 1.00       | 1.00                          | 1.00                     | 1.00       | 1.00                          |
|                      |         |                    | (0.00)     | (0.02)                        | (0.02)                  | (0.00)     | (0.03)                        | (0.03)              | (0.00)     | (0.02)                        | (0.02)                   | (0.00)     | (0.03)                        |
| 2a                   | (0,0,1) | d                  | 1.00       | 1.01                          | 1.00                    | 1.00       | 1.00                          | 1.00                | 1.01       | 1.01                          | 1.00                     | 1.00       | 1.00                          |
|                      |         |                    | (0.00)     | (0.02)                        | (0.02)                  | (0.00)     | (0.03)                        | (0.03)              | (0.01)     | (0.02)                        | (0.02)                   | (0.00)     | (0.03)                        |
| 2b                   | (0,0,0) | a                  | 1.00       | 1.00                          | 1.00                    | 1.00       | 1.00                          | 1.00                | 1.00       | 1.00                          | 1.00                     | 1.00       | 1.00                          |
|                      |         |                    | (0.00)     | (0.02)                        | (0.02)                  | (0.00)     | (0.03)                        | (0.03)              | (0.00)     | (0.02)                        | (0.02)                   | (0.00)     | (0.03)                        |
| 2b                   | (1,0,0) | a                  | 1.00       | 1.02                          | 0.99                    | 1.00       | 1.03                          | 0.97                | 1.00       | 1.00                          | 1.00                     | 1.00       | 1.00                          |
|                      |         |                    | (0.02)     | (0.03)                        | (0.02)                  | (0.00)     | (0.04)                        | (0.04)              | (0.01)     | (0.02)                        | (0.02)                   | (0.00)     | (0.03)                        |
| 2b                   | (1,0,0) | r                  | 1.00       | 1.00                          | 1.00                    | 1.00       | 1.01                          | 0.99                | 1.00       | 1.00                          | 1.00                     | 1.00       | 1.00                          |
|                      |         |                    | (0.00)     | (0.02)                        | (0.02)                  | (0.00)     | (0.03)                        | (0.03)              | (0.00)     | (0.02)                        | (0.02)                   | (0.00)     | (0.03)                        |
| 2b                   | (1,0,0) | d                  | 1.00       | 1.02                          | 0.99                    | 1.00       | 1.03                          | 0.98                | 1.00       | 1.00                          | 1.00                     | 1.00       | 1.01                          |
|                      |         |                    | (0.01)     | (0.03)                        | (0.02)                  | (0.00)     | (0.03)                        | (0.03)              | (0.00)     | (0.02)                        | (0.02)                   | (0.00)     | (0.03)                        |
| 2b                   | (0,1,0) | a                  | 1.00       | 1.00                          | 1.00                    | 1.00       | 1.00                          | 1.01                | 1.00       | 1.00                          | 1.00                     | 1.00       | 1.00                          |
|                      |         |                    | (0.01)     | (0.02)                        | (0.02)                  | (0.00)     | (0.03)                        | (0.03)              | (0.00)     | (0.02)                        | (0.02)                   | (0.00)     | (0.03)                        |
| 2b                   | (0,0,1) | a                  | 1.00       | 1.01                          | 1.00                    | 1.00       | 1.01                          | 0.99                | 1.00       | 1.00                          | 1.00                     | 1.00       | 1.00                          |
|                      |         |                    | (0.01)     | (0.02)                        | (0.02)                  | (0.00)     | (0.03)                        | (0.03)              | (0.00)     | (0.02)                        | (0.02)                   | (0.00)     | (0.03)                        |
| 2b                   | (0,0,1) | r                  | 1.00       | 1.00                          | 1.00                    | 1.00       | 1.01                          | 0.99                | 1.00       | 1.00                          | 1.00                     | 1.00       | 1.00                          |
|                      |         |                    | (0.00)     | (0.02)                        | (0.02)                  | (0.00)     | (0.03)                        | (0.03)              | (0.00)     | (0.02)                        | (0.02)                   | (0.00)     | (0.03)                        |
| 2b                   | (0,0,1) | d                  | 1.00       | 1.01                          | 1.00                    | 1.00       | 1.01                          | 1.00                | 1.00       | 1.00                          | 1.00                     | 1.00       | 1.00                          |
|                      |         |                    | (0.01)     | (0.02)                        | (0.02)                  | (0.00)     | (0.03)                        | (0.03)              | (0.00)     | (0.02)                        | (0.02)                   | (0.00)     | (0.03)                        |
| 2c                   | (1,0,0) | r                  | 0.89       | 0.90                          | 0.99                    | 1.00       | 1.01                          | 0.99                | 0.85       | 0.86                          | 1.00                     | 1.00       | 1.00                          |
|                      |         |                    | (0.02)     | (0.02)                        | (0.02)                  | (0.00)     | (0.03)                        | (0.03)              | (0.00)     | (0.02)                        | (0.02)                   | (0.00)     | (0.03)                        |
| 2c                   | (1,0,0) | d                  | 0.97       | 0.98                          | 0.99                    | 1.00       | 1.01                          | 0.99                | 0.91       | 0.91                          | 1.00                     | 1.00       | 1.00                          |
|                      |         |                    | (0.02)     | (0.02)                        | (0.02)                  | (0.00)     | (0.03)                        | (0.03)              | (0.00)     | (0.02)                        | (0.02)                   | (0.00)     | (0.03)                        |
| 2c                   | (0,0,1) | r                  | 0.86       | 0.86                          | 1.00                    | 1.00       | 1.00                          | 1.00                | 0.85       | 0.85                          | 1.00                     | 1.00       | 1.00                          |
|                      |         |                    | (0.01)     | (0.02)                        | (0.02)                  | (0.00)     | (0.03)                        | (0.03)              | (0.00)     | (0.02)                        | (0.02)                   | (0.00)     | (0.03)                        |
| 2c                   | (0,0,1) | d                  | 0.87       | 0.88                          | 0.99                    | 1.00       | 1.01                          | 1.00                | 0.88       | 0.89                          | 0.99                     | 1.00       | 1.01                          |
|                      |         |                    | (0.02)     | (0.03)                        | (0.02)                  | (0.00)     | (0.03)                        | (0.03)              | (0.00)     | (0.02)                        | (0.03)                   | (0.00)     | (0.03)                        |

Mean and standard deviation (SD) for  $l_{approx}$ ,  $l_{mean}$  and the ratio  $l_{approx}/l_{mean}$  are shown over 200 simulation runs for gene-environment (GxE) interaction and marginal association analyses for two sample sizes,  $n = 1000$  and  $10000$ . M, genotype model (a: additive, r: recessive, d: dominant).  $b_G$ ,  $b_{GE}$  and  $b_Z$  are effect size parameters of genotype, gene-environment interaction and covariate, respectively; 0 and 1 denote absence and presence of effect.

**S3 Table (continued). Comparison between  $l_{approx}$  and  $l_{mean}$  in binary phenotype simulations**

| Scenario             |   |  | GxE ( $n = 1000$ ) |                |                               | Marginal ( $n = 1000$ ) |                |                               | GxE ( $n = 10000$ ) |                |                               | Marginal ( $n = 10000$ ) |                |                               |
|----------------------|---|--|--------------------|----------------|-------------------------------|-------------------------|----------------|-------------------------------|---------------------|----------------|-------------------------------|--------------------------|----------------|-------------------------------|
| $(b_G, b_{GE}, b_Z)$ | M |  | $l_{approx}$       | $l_{mean}$     | $\frac{l_{approx}}{l_{mean}}$ | $l_{approx}$            | $l_{mean}$     | $\frac{l_{approx}}{l_{mean}}$ | $l_{approx}$        | $l_{mean}$     | $\frac{l_{approx}}{l_{mean}}$ | $l_{approx}$             | $l_{mean}$     | $\frac{l_{approx}}{l_{mean}}$ |
| 2d (1,0,0)           | r |  | 1.02<br>(0.32)     | 1.01<br>(0.23) | 1.00<br>(0.06)                | 1.00<br>(0.00)          | 1.00<br>(0.03) | 1.00<br>(0.03)                | 1.02<br>(0.16)      | 1.02<br>(0.12) | 1.00<br>(0.04)                | 1.00<br>(0.00)           | 1.00<br>(0.03) | 1.00<br>(0.03)                |
| 2d (1,0,0)           | d |  | 1.03<br>(0.29)     | 1.03<br>(0.21) | 0.99<br>(0.06)                | 1.00<br>(0.00)          | 1.01<br>(0.03) | 0.99<br>(0.03)                | 1.03<br>(0.18)      | 1.02<br>(0.14) | 1.01<br>(0.04)                | 1.00<br>(0.00)           | 1.00<br>(0.03) | 1.00<br>(0.03)                |
| 2d (0,0,1)           | r |  | 1.74<br>(1.09)     | 1.52<br>(0.76) | 1.09<br>(0.12)                | 1.00<br>(0.00)          | 1.01<br>(0.03) | 1.00<br>(0.03)                | 2.00<br>(0.97)      | 1.98<br>(0.95) | 1.01<br>(0.03)                | 1.00<br>(0.00)           | 1.00<br>(0.03) | 1.00<br>(0.03)                |
| 2d (0,0,1)           | d |  | 9.68<br>(9.66)     | 5.68<br>(5.14) | 1.35<br>(0.41)                | 0.99<br>(0.01)          | 0.99<br>(0.03) | 1.00<br>(0.03)                | 1.97<br>(0.95)      | 1.93<br>(0.92) | 1.02<br>(0.03)                | 1.00<br>(0.00)           | 1.00<br>(0.03) | 1.00<br>(0.03)                |
| 2e (0,0,0)           | a |  | 1.05<br>(0.02)     | 1.05<br>(0.03) | 1.01<br>(0.02)                | 1.00<br>(0.00)          | 1.00<br>(0.03) | 1.01<br>(0.03)                | 1.05<br>(0.04)      | 1.04<br>(0.04) | 1.00<br>(0.02)                | 1.00<br>(0.00)           | 1.00<br>(0.03) | 1.00<br>(0.03)                |
| 2e (1,0,0)           | a |  | 1.06<br>(0.06)     | 1.07<br>(0.06) | 0.99<br>(0.02)                | 1.00<br>(0.00)          | 1.03<br>(0.03) | 0.97<br>(0.03)                | 1.04<br>(0.05)      | 1.03<br>(0.05) | 1.00<br>(0.02)                | 1.00<br>(0.00)           | 1.00<br>(0.03) | 1.00<br>(0.03)                |
| 2e (1,0,0)           | r |  | 1.06<br>(0.02)     | 1.06<br>(0.03) | 1.00<br>(0.02)                | 1.00<br>(0.00)          | 1.01<br>(0.03) | 0.99<br>(0.03)                | 1.04<br>(0.03)      | 1.03<br>(0.04) | 1.00<br>(0.02)                | 1.00<br>(0.00)           | 1.00<br>(0.03) | 1.00<br>(0.03)                |
| 2e (1,0,0)           | d |  | 1.06<br>(0.03)     | 1.06<br>(0.03) | 0.99<br>(0.02)                | 1.00<br>(0.00)          | 1.02<br>(0.03) | 0.98<br>(0.03)                | 1.05<br>(0.07)      | 1.04<br>(0.07) | 1.00<br>(0.02)                | 1.00<br>(0.00)           | 1.00<br>(0.04) | 1.00<br>(0.04)                |
| 2e (0,1,0)           | a |  | 1.33<br>(1.91)     | 1.42<br>(1.04) | 0.87<br>(0.10)                | 1.00<br>(0.00)          | 1.00<br>(0.03) | 1.00<br>(0.03)                | 11.60<br>(3.00)     | 8.88<br>(1.38) | 1.29<br>(0.15)                | 0.98<br>(0.00)           | 0.98<br>(0.03) | 1.00<br>(0.03)                |
| 2e (0,0,1)           | a |  | 1.06<br>(0.02)     | 1.06<br>(0.03) | 1.00<br>(0.02)                | 1.00<br>(0.00)          | 1.00<br>(0.03) | 1.00<br>(0.03)                | 4.20<br>(2.32)      | 4.14<br>(1.92) | 0.97<br>(0.10)                | 1.00<br>(0.00)           | 1.00<br>(0.03) | 1.00<br>(0.03)                |
| 2e (0,0,1)           | r |  | 1.06<br>(0.04)     | 1.07<br>(0.04) | 0.99<br>(0.03)                | 1.00<br>(0.00)          | 1.00<br>(0.03) | 1.00<br>(0.03)                | 1.04<br>(0.04)      | 1.04<br>(0.05) | 1.00<br>(0.02)                | 1.00<br>(0.00)           | 1.00<br>(0.03) | 1.00<br>(0.03)                |
| 2e (0,0,1)           | d |  | 1.25<br>(1.41)     | 1.32<br>(0.78) | 0.90<br>(0.08)                | 1.00<br>(0.00)          | 1.00<br>(0.03) | 1.00<br>(0.03)                | 9.76<br>(2.62)      | 8.06<br>(1.62) | 1.19<br>(0.11)                | 0.99<br>(0.00)           | 0.99<br>(0.03) | 1.00<br>(0.03)                |
| 3a (0,0,0)           | a |  | 1.01<br>(0.00)     | 1.01<br>(0.02) | 1.00<br>(0.02)                | 1.01<br>(0.00)          | 1.01<br>(0.03) | 1.00<br>(0.03)                | 1.00<br>(0.00)      | 1.00<br>(0.02) | 1.00<br>(0.02)                | 1.00<br>(0.00)           | 1.00<br>(0.03) | 1.00<br>(0.03)                |
| 3a (1,0,0)           | a |  | 1.01<br>(0.02)     | 1.02<br>(0.03) | 0.99<br>(0.02)                | 1.01<br>(0.00)          | 1.04<br>(0.03) | 0.97<br>(0.03)                | 1.00<br>(0.01)      | 1.00<br>(0.02) | 1.00<br>(0.02)                | 1.00<br>(0.00)           | 1.00<br>(0.03) | 1.00<br>(0.03)                |
| 3a (1,0,0)           | r |  | 1.01<br>(0.01)     | 1.01<br>(0.03) | 1.00<br>(0.03)                | 1.01<br>(0.00)          | 1.02<br>(0.03) | 0.99<br>(0.03)                | 1.00<br>(0.00)      | 1.01<br>(0.02) | 0.99<br>(0.02)                | 1.00<br>(0.00)           | 1.02<br>(0.03) | 0.98<br>(0.03)                |
| 3a (1,0,0)           | d |  | 1.01<br>(0.01)     | 1.02<br>(0.02) | 0.99<br>(0.02)                | 1.01<br>(0.00)          | 1.02<br>(0.03) | 0.99<br>(0.03)                | 1.00<br>(0.00)      | 1.00<br>(0.02) | 1.00<br>(0.02)                | 1.00<br>(0.00)           | 1.00<br>(0.03) | 1.01<br>(0.03)                |
| 3a (0,1,0)           | a |  | 1.01<br>(0.01)     | 1.01<br>(0.02) | 1.00<br>(0.02)                | 1.01<br>(0.00)          | 1.01<br>(0.03) | 1.00<br>(0.03)                | 1.00<br>(0.00)      | 1.00<br>(0.02) | 1.00<br>(0.02)                | 1.00<br>(0.00)           | 1.00<br>(0.03) | 1.00<br>(0.03)                |
| 3a (0,0,1)           | a |  | 1.03<br>(0.02)     | 1.04<br>(0.03) | 0.99<br>(0.02)                | 1.01<br>(0.00)          | 1.01<br>(0.03) | 1.00<br>(0.03)                | 1.01<br>(0.00)      | 1.01<br>(0.02) | 1.00<br>(0.02)                | 1.00<br>(0.00)           | 1.00<br>(0.03) | 1.00<br>(0.03)                |
| 3a (0,0,1)           | r |  | 1.01<br>(0.01)     | 1.01<br>(0.02) | 1.00<br>(0.02)                | 1.01<br>(0.00)          | 1.01<br>(0.03) | 1.00<br>(0.03)                | 1.00<br>(0.00)      | 1.00<br>(0.02) | 1.00<br>(0.02)                | 1.00<br>(0.00)           | 1.00<br>(0.03) | 1.00<br>(0.03)                |
| 3a (0,0,1)           | d |  | 1.01<br>(0.01)     | 1.02<br>(0.03) | 0.99<br>(0.03)                | 1.01<br>(0.00)          | 1.01<br>(0.03) | 1.00<br>(0.03)                | 1.00<br>(0.00)      | 1.00<br>(0.02) | 1.00<br>(0.02)                | 1.00<br>(0.00)           | 1.00<br>(0.03) | 1.00<br>(0.03)                |

Mean and standard deviation (SD) for  $l_{approx}$ ,  $l_{mean}$  and the ratio  $l_{approx}/l_{mean}$  are shown over 200 simulation runs for gene-environment (GxE) interaction and marginal association analyses for two sample sizes,  $n = 1000$  and  $10000$ . M, genotype model (a: additive, r: recessive, d: dominant).  $b_G$ ,  $b_{GE}$  and  $b_Z$  are effect size parameters of genotype, gene-environment interaction and covariate, respectively; 0 and 1 denote absence and presence of effect.

**S3 Table (continued). Comparison between  $l_{approx}$  and  $l_{mean}$  in binary phenotype simulations**

| Scenario             |   | GxE ( $n = 1000$ ) |                |                               | Marginal ( $n = 1000$ ) |                |                               | GxE ( $n = 10000$ ) |                |                               | Marginal ( $n = 10000$ ) |                |                               |
|----------------------|---|--------------------|----------------|-------------------------------|-------------------------|----------------|-------------------------------|---------------------|----------------|-------------------------------|--------------------------|----------------|-------------------------------|
| $(b_G, b_{GE}, b_Z)$ | M | $l_{approx}$       | $l_{mean}$     | $\frac{l_{approx}}{l_{mean}}$ | $l_{approx}$            | $l_{mean}$     | $\frac{l_{approx}}{l_{mean}}$ | $l_{approx}$        | $l_{mean}$     | $\frac{l_{approx}}{l_{mean}}$ | $l_{approx}$             | $l_{mean}$     | $\frac{l_{approx}}{l_{mean}}$ |
| 3b (0,0,0)           | a | 1.00<br>(0.00)     | 1.00<br>(0.02) | 1.00<br>(0.02)                | 1.00<br>(0.00)          | 1.01<br>(0.03) | 1.00<br>(0.03)                | 1.00<br>(0.00)      | 1.00<br>(0.02) | 1.00<br>(0.02)                | 1.00<br>(0.00)           | 1.00<br>(0.03) | 1.00<br>(0.03)                |
| 3b (1,0,0)           | a | 1.00<br>(0.01)     | 1.02<br>(0.03) | 0.98<br>(0.02)                | 1.00<br>(0.00)          | 1.03<br>(0.04) | 0.97<br>(0.03)                | 1.00<br>(0.00)      | 1.00<br>(0.02) | 1.00<br>(0.02)                | 1.00<br>(0.00)           | 1.00<br>(0.03) | 1.00<br>(0.03)                |
| 3b (1,0,0)           | r | 1.00<br>(0.00)     | 1.01<br>(0.02) | 1.00<br>(0.02)                | 1.00<br>(0.00)          | 1.01<br>(0.03) | 0.99<br>(0.03)                | 1.00<br>(0.00)      | 1.00<br>(0.02) | 1.00<br>(0.02)                | 1.00<br>(0.00)           | 1.00<br>(0.03) | 1.00<br>(0.03)                |
| 3b (1,0,0)           | d | 1.00<br>(0.01)     | 1.01<br>(0.02) | 0.99<br>(0.02)                | 1.00<br>(0.00)          | 1.02<br>(0.03) | 0.98<br>(0.03)                | 1.00<br>(0.00)      | 1.00<br>(0.02) | 1.00<br>(0.02)                | 1.00<br>(0.00)           | 1.00<br>(0.03) | 1.00<br>(0.03)                |
| 3b (0,1,0)           | a | 1.00<br>(0.04)     | 1.00<br>(0.05) | 1.00<br>(0.02)                | 1.00<br>(0.01)          | 1.01<br>(0.03) | 1.00<br>(0.03)                | 1.00<br>(0.01)      | 1.00<br>(0.02) | 1.00<br>(0.02)                | 1.00<br>(0.00)           | 1.00<br>(0.03) | 1.00<br>(0.03)                |
| 3b (0,0,1)           | a | 1.03<br>(0.01)     | 1.02<br>(0.02) | 1.00<br>(0.02)                | 1.00<br>(0.00)          | 1.00<br>(0.03) | 1.01<br>(0.03)                | 1.00<br>(0.00)      | 1.00<br>(0.02) | 1.00<br>(0.02)                | 1.00<br>(0.00)           | 1.00<br>(0.03) | 1.00<br>(0.03)                |
| 3b (0,0,1)           | r | 1.00<br>(0.00)     | 1.00<br>(0.02) | 1.00<br>(0.02)                | 1.00<br>(0.00)          | 1.00<br>(0.03) | 1.00<br>(0.03)                | 1.00<br>(0.00)      | 1.01<br>(0.02) | 0.99<br>(0.02)                | 1.00<br>(0.00)           | 1.02<br>(0.03) | 0.98<br>(0.03)                |
| 3b (0,0,1)           | d | 1.01<br>(0.01)     | 1.01<br>(0.02) | 1.00<br>(0.02)                | 1.00<br>(0.00)          | 1.00<br>(0.04) | 1.00<br>(0.04)                | 1.01<br>(0.00)      | 1.01<br>(0.02) | 1.00<br>(0.02)                | 1.00<br>(0.00)           | 1.00<br>(0.03) | 1.00<br>(0.03)                |
| 3c (0,0,0)           | a | 1.00<br>(0.00)     | 1.00<br>(0.02) | 1.00<br>(0.02)                | 1.00<br>(0.00)          | 1.00<br>(0.03) | 1.00<br>(0.03)                | 1.00<br>(0.00)      | 1.00<br>(0.02) | 1.00<br>(0.02)                | 1.00<br>(0.00)           | 1.00<br>(0.03) | 1.00<br>(0.03)                |
| 3c (1,0,0)           | a | 1.00<br>(0.00)     | 1.01<br>(0.02) | 0.99<br>(0.02)                | 1.00<br>(0.00)          | 1.01<br>(0.03) | 0.99<br>(0.03)                | 1.00<br>(0.00)      | 1.00<br>(0.02) | 1.00<br>(0.02)                | 1.00<br>(0.00)           | 1.00<br>(0.03) | 1.00<br>(0.03)                |
| 3c (1,0,0)           | r | 1.00<br>(0.00)     | 1.01<br>(0.02) | 0.99<br>(0.02)                | 1.00<br>(0.00)          | 1.02<br>(0.03) | 0.99<br>(0.03)                | 1.00<br>(0.00)      | 1.00<br>(0.02) | 1.00<br>(0.02)                | 1.00<br>(0.00)           | 1.00<br>(0.03) | 1.00<br>(0.03)                |
| 3c (1,0,0)           | d | 1.00<br>(0.00)     | 1.02<br>(0.02) | 0.99<br>(0.02)                | 1.00<br>(0.00)          | 1.02<br>(0.03) | 0.98<br>(0.03)                | 1.00<br>(0.00)      | 1.00<br>(0.02) | 1.00<br>(0.02)                | 1.00<br>(0.00)           | 1.00<br>(0.03) | 1.00<br>(0.03)                |
| 3c (0,1,0)           | a | 1.00<br>(0.00)     | 1.00<br>(0.02) | 1.00<br>(0.03)                | 1.00<br>(0.00)          | 1.00<br>(0.04) | 1.00<br>(0.03)                | 1.00<br>(0.00)      | 1.00<br>(0.02) | 1.00<br>(0.02)                | 1.00<br>(0.00)           | 1.00<br>(0.03) | 1.00<br>(0.03)                |
| 3c (0,0,1)           | a | 1.00<br>(0.00)     | 1.01<br>(0.02) | 0.99<br>(0.02)                | 1.00<br>(0.00)          | 1.01<br>(0.03) | 1.00<br>(0.03)                | 1.00<br>(0.00)      | 1.00<br>(0.02) | 1.00<br>(0.02)                | 1.00<br>(0.00)           | 1.00<br>(0.03) | 1.00<br>(0.03)                |
| 3c (0,0,1)           | r | 1.00<br>(0.00)     | 1.01<br>(0.02) | 1.00<br>(0.02)                | 1.00<br>(0.00)          | 1.01<br>(0.03) | 1.00<br>(0.03)                | 1.00<br>(0.00)      | 1.01<br>(0.02) | 0.99<br>(0.02)                | 1.00<br>(0.00)           | 1.03<br>(0.03) | 0.98<br>(0.03)                |
| 3c (0,0,1)           | d | 1.00<br>(0.00)     | 1.01<br>(0.02) | 1.00<br>(0.02)                | 1.00<br>(0.00)          | 1.01<br>(0.03) | 1.00<br>(0.03)                | 1.00<br>(0.00)      | 1.00<br>(0.02) | 1.00<br>(0.02)                | 1.00<br>(0.00)           | 1.03<br>(0.04) | 0.97<br>(0.04)                |
| 3d (0,0,0)           | a | 1.00<br>(0.00)     | 1.01<br>(0.02) | 1.00<br>(0.02)                | 1.00<br>(0.00)          | 1.01<br>(0.03) | 0.99<br>(0.03)                | 1.00<br>(0.00)      | 1.00<br>(0.02) | 1.00<br>(0.02)                | 1.00<br>(0.00)           | 1.00<br>(0.03) | 1.00<br>(0.03)                |
| 3d (1,0,0)           | a | 1.00<br>(0.00)     | 1.01<br>(0.02) | 0.99<br>(0.02)                | 1.00<br>(0.00)          | 1.02<br>(0.03) | 0.98<br>(0.03)                | 1.00<br>(0.00)      | 1.00<br>(0.02) | 1.00<br>(0.02)                | 1.00<br>(0.00)           | 1.00<br>(0.03) | 1.00<br>(0.03)                |
| 3d (1,0,0)           | r | 1.00<br>(0.00)     | 1.01<br>(0.02) | 1.00<br>(0.02)                | 1.00<br>(0.00)          | 1.01<br>(0.03) | 1.00<br>(0.03)                | 1.00<br>(0.00)      | 1.01<br>(0.02) | 0.99<br>(0.02)                | 1.00<br>(0.00)           | 1.02<br>(0.03) | 0.98<br>(0.03)                |
| 3d (1,0,0)           | d | 1.00<br>(0.01)     | 1.02<br>(0.03) | 0.99<br>(0.02)                | 1.00<br>(0.00)          | 1.02<br>(0.03) | 0.98<br>(0.03)                | 1.00<br>(0.00)      | 1.00<br>(0.02) | 1.00<br>(0.02)                | 1.00<br>(0.00)           | 1.00<br>(0.03) | 1.00<br>(0.03)                |
| 3d (0,1,0)           | a | 1.00<br>(0.03)     | 1.00<br>(0.04) | 1.00<br>(0.02)                | 1.00<br>(0.00)          | 1.00<br>(0.03) | 1.00<br>(0.03)                | 1.00<br>(0.01)      | 1.00<br>(0.02) | 1.00<br>(0.02)                | 1.00<br>(0.00)           | 1.00<br>(0.03) | 1.00<br>(0.03)                |
| 3d (0,0,1)           | a | 1.01<br>(0.01)     | 1.01<br>(0.03) | 1.00<br>(0.02)                | 1.00<br>(0.00)          | 1.03<br>(0.04) | 0.97<br>(0.03)                | 1.03<br>(0.01)      | 1.03<br>(0.02) | 1.00<br>(0.02)                | 1.00<br>(0.00)           | 0.99<br>(0.03) | 1.00<br>(0.03)                |
| 3d (0,0,1)           | r | 1.00<br>(0.00)     | 1.00<br>(0.02) | 1.00<br>(0.02)                | 1.00<br>(0.00)          | 1.00<br>(0.03) | 1.00<br>(0.03)                | 1.00<br>(0.00)      | 1.00<br>(0.02) | 1.00<br>(0.02)                | 1.00<br>(0.00)           | 1.00<br>(0.03) | 1.00<br>(0.03)                |
| 3d (0,0,1)           | d | 1.01<br>(0.01)     | 1.02<br>(0.02) | 0.99<br>(0.02)                | 1.00<br>(0.00)          | 1.03<br>(0.03) | 0.97<br>(0.03)                | 1.02<br>(0.01)      | 1.02<br>(0.02) | 1.00<br>(0.02)                | 1.00<br>(0.00)           | 1.00<br>(0.03) | 1.00<br>(0.03)                |

Mean and standard deviation (SD) for  $l_{approx}$ ,  $l_{mean}$  and the ratio  $l_{approx}/l_{mean}$  are shown over 200 simulation runs for gene-environment (GxE) interaction and marginal association analyses for two sample sizes,  $n = 1000$  and  $10000$ . M, genotype model (a: additive, r: recessive, d: dominant).  $b_G$ ,  $b_{GE}$  and  $b_Z$  are effect size parameters of genotype, gene-environment interaction and covariate, respectively; 0 and 1 denote absence and presence of effect.

**S3 Table (continued). Comparison between  $l_{approx}$  and  $l_{mean}$  in binary phenotype simulations**

| Scenario             |         | GxE ( $n = 1000$ ) |                |                               | Marginal ( $n = 1000$ ) |                |                               | GxE ( $n = 10000$ ) |                |                               | Marginal ( $n = 10000$ ) |                |                               |
|----------------------|---------|--------------------|----------------|-------------------------------|-------------------------|----------------|-------------------------------|---------------------|----------------|-------------------------------|--------------------------|----------------|-------------------------------|
| $(b_G, b_{GE}, b_Z)$ | M       | $l_{approx}$       | $l_{mean}$     | $\frac{l_{approx}}{l_{mean}}$ | $l_{approx}$            | $l_{mean}$     | $\frac{l_{approx}}{l_{mean}}$ | $l_{approx}$        | $l_{mean}$     | $\frac{l_{approx}}{l_{mean}}$ | $l_{approx}$             | $l_{mean}$     | $\frac{l_{approx}}{l_{mean}}$ |
| 4a                   | (0,0,0) | a                  | 1.00<br>(0.00) | 1.00<br>(0.07)                | 1.01<br>(0.07)          | 1.00<br>(0.00) | 1.00<br>(0.10)                | 1.01<br>(0.09)      | 1.00<br>(0.00) | 1.01<br>(0.07)                | 1.00<br>(0.07)           | 1.00<br>(0.00) | 1.01<br>(0.09)                |
| 4a                   | (1,0,0) | a                  | 1.00<br>(0.02) | 1.19<br>(0.09)                | 0.84<br>(0.06)          | 1.00<br>(0.00) | 1.39<br>(0.17)                | 0.73<br>(0.09)      | 1.00<br>(0.01) | 2.25<br>(0.22)                | 0.45<br>(0.05)           | 1.00<br>(0.00) | 3.58<br>(0.42)                |
| 4a                   | (1,0,0) | r                  | 1.00<br>(0.00) | 1.00<br>(0.06)                | 1.01<br>(0.06)          | 1.00<br>(0.00) | 1.01<br>(0.09)                | 1.00<br>(0.08)      | 1.00<br>(0.00) | 1.01<br>(0.06)                | 1.00<br>(0.06)           | 1.00<br>(0.00) | 1.01<br>(0.09)                |
| 4a                   | (1,0,0) | d                  | 1.00<br>(0.01) | 1.05<br>(0.07)                | 0.96<br>(0.07)          | 1.00<br>(0.00) | 1.10<br>(0.12)                | 0.92<br>(0.10)      | 1.00<br>(0.00) | 1.59<br>(0.14)                | 0.63<br>(0.06)           | 1.00<br>(0.00) | 2.17<br>(0.27)                |
| 4a                   | (0,1,0) | a                  | 1.00<br>(0.02) | 1.00<br>(0.07)                | 1.01<br>(0.07)          | 1.00<br>(0.00) | 1.00<br>(0.09)                | 1.01<br>(0.09)      | 1.00<br>(0.01) | 1.01<br>(0.07)                | 1.00<br>(0.07)           | 1.00<br>(0.00) | 1.01<br>(0.09)                |
| 4a                   | (0,0,1) | a                  | 1.01<br>(0.01) | 1.12<br>(0.09)                | 0.91<br>(0.07)          | 1.00<br>(0.00) | 1.00<br>(0.09)                | 1.01<br>(0.09)      | 1.02<br>(0.01) | 2.28<br>(0.16)                | 0.45<br>(0.03)           | 1.00<br>(0.00) | 0.99<br>(0.09)                |
| 4a                   | (0,0,1) | r                  | 1.00<br>(0.00) | 1.02<br>(0.07)                | 0.99<br>(0.06)          | 1.00<br>(0.00) | 1.01<br>(0.10)                | 1.00<br>(0.09)      | 1.00<br>(0.00) | 1.17<br>(0.10)                | 0.86<br>(0.07)           | 1.00<br>(0.00) | 1.01<br>(0.08)                |
| 4a                   | (0,0,1) | d                  | 1.02<br>(0.02) | 1.09<br>(0.09)                | 0.94<br>(0.07)          | 1.00<br>(0.00) | 1.01<br>(0.09)                | 1.00<br>(0.09)      | 1.01<br>(0.01) | 1.85<br>(0.16)                | 0.55<br>(0.05)           | 1.00<br>(0.00) | 1.01<br>(0.09)                |
| 4b                   | (0,0,0) | a                  | 1.00<br>(0.00) | 1.00<br>(0.02)                | 1.00<br>(0.02)          | 1.00<br>(0.00) | 1.01<br>(0.04)                | 1.00<br>(0.04)      | 1.00<br>(0.00) | 1.00<br>(0.02)                | 1.00<br>(0.02)           | 1.00<br>(0.00) | 1.00<br>(0.03)                |
| 4b                   | (1,0,0) | a                  | 1.00<br>(0.00) | 1.01<br>(0.02)                | 0.99<br>(0.02)          | 1.00<br>(0.00) | 1.02<br>(0.03)                | 0.99<br>(0.03)      | 1.00<br>(0.00) | 1.00<br>(0.02)                | 1.00<br>(0.02)           | 1.00<br>(0.00) | 1.00<br>(0.03)                |
| 4b                   | (1,0,0) | r                  | 1.00<br>(0.00) | 1.01<br>(0.02)                | 1.00<br>(0.02)          | 1.00<br>(0.00) | 1.00<br>(0.03)                | 1.00<br>(0.03)      | 1.00<br>(0.00) | 1.01<br>(0.02)                | 0.99<br>(0.02)           | 1.00<br>(0.00) | 1.02<br>(0.03)                |
| 4b                   | (1,0,0) | d                  | 1.00<br>(0.01) | 1.01<br>(0.02)                | 0.99<br>(0.02)          | 1.00<br>(0.00) | 1.02<br>(0.03)                | 0.98<br>(0.03)      | 1.00<br>(0.00) | 1.00<br>(0.02)                | 1.00<br>(0.02)           | 1.00<br>(0.00) | 1.00<br>(0.03)                |
| 4b                   | (0,1,0) | a                  | 1.00<br>(0.02) | 1.00<br>(0.03)                | 1.00<br>(0.02)          | 1.00<br>(0.00) | 1.00<br>(0.03)                | 1.00<br>(0.03)      | 1.00<br>(0.00) | 1.00<br>(0.02)                | 1.00<br>(0.02)           | 1.00<br>(0.00) | 1.00<br>(0.03)                |
| 4b                   | (0,0,1) | a                  | 1.02<br>(0.02) | 1.03<br>(0.03)                | 0.99<br>(0.02)          | 1.00<br>(0.00) | 1.00<br>(0.03)                | 1.00<br>(0.03)      | 1.02<br>(0.01) | 1.02<br>(0.02)                | 1.00<br>(0.02)           | 1.00<br>(0.00) | 1.00<br>(0.03)                |
| 4b                   | (0,0,1) | r                  | 1.00<br>(0.00) | 1.00<br>(0.02)                | 1.00<br>(0.02)          | 1.00<br>(0.00) | 1.00<br>(0.03)                | 1.00<br>(0.03)      | 1.00<br>(0.00) | 1.00<br>(0.02)                | 1.00<br>(0.02)           | 1.00<br>(0.00) | 1.00<br>(0.03)                |
| 4b                   | (0,0,1) | d                  | 1.01<br>(0.01) | 1.02<br>(0.02)                | 0.99<br>(0.02)          | 1.00<br>(0.00) | 1.00<br>(0.03)                | 1.00<br>(0.03)      | 1.00<br>(0.00) | 1.02<br>(0.02)                | 0.98<br>(0.02)           | 1.00<br>(0.00) | 1.00<br>(0.03)                |
| 4c                   | (0,0,0) | a                  | 1.00<br>(0.00) | 1.00<br>(0.05)                | 1.00<br>(0.05)          | 1.00<br>(0.00) | 1.00<br>(0.07)                | 1.01<br>(0.07)      | 1.00<br>(0.00) | 1.00<br>(0.06)                | 1.00<br>(0.06)           | 1.00<br>(0.00) | 1.00<br>(0.09)                |
| 4c                   | (1,0,0) | a                  | 1.00<br>(0.01) | 1.11<br>(0.08)                | 0.91<br>(0.06)          | 1.00<br>(0.00) | 1.23<br>(0.13)                | 0.83<br>(0.09)      | 1.00<br>(0.00) | 1.07<br>(0.06)                | 0.94<br>(0.06)           | 1.00<br>(0.00) | 1.14<br>(0.11)                |
| 4c                   | (1,0,0) | r                  | 1.00<br>(0.00) | 1.01<br>(0.05)                | 1.00<br>(0.05)          | 1.00<br>(0.00) | 1.01<br>(0.07)                | 1.00<br>(0.07)      | 1.00<br>(0.00) | 1.27<br>(0.09)                | 0.79<br>(0.06)           | 1.00<br>(0.00) | 1.55<br>(0.17)                |
| 4c                   | (1,0,0) | d                  | 1.00<br>(0.01) | 1.09<br>(0.06)                | 0.92<br>(0.06)          | 1.00<br>(0.00) | 1.18<br>(0.11)                | 0.86<br>(0.08)      | 1.00<br>(0.00) | 1.25<br>(0.10)                | 0.80<br>(0.06)           | 1.00<br>(0.00) | 1.50<br>(0.17)                |
| 4c                   | (0,1,0) | a                  | 1.00<br>(0.02) | 1.00<br>(0.05)                | 1.01<br>(0.05)          | 1.00<br>(0.00) | 1.00<br>(0.08)                | 1.01<br>(0.08)      | 1.00<br>(0.01) | 1.00<br>(0.05)                | 1.00<br>(0.05)           | 1.00<br>(0.00) | 1.01<br>(0.09)                |
| 4c                   | (0,0,1) | a                  | 1.03<br>(0.02) | 1.14<br>(0.08)                | 0.91<br>(0.06)          | 1.00<br>(0.00) | 0.99<br>(0.07)                | 1.02<br>(0.07)      | 1.00<br>(0.00) | 1.06<br>(0.06)                | 0.95<br>(0.05)           | 1.00<br>(0.00) | 1.01<br>(0.08)                |
| 4c                   | (0,0,1) | r                  | 1.00<br>(0.00) | 1.01<br>(0.05)                | 1.00<br>(0.05)          | 1.00<br>(0.00) | 1.00<br>(0.08)                | 1.01<br>(0.08)      | 1.00<br>(0.00) | 1.02<br>(0.06)                | 0.98<br>(0.06)           | 1.00<br>(0.00) | 1.01<br>(0.08)                |
| 4c                   | (0,0,1) | d                  | 1.01<br>(0.01) | 1.06<br>(0.06)                | 0.95<br>(0.06)          | 1.00<br>(0.00) | 1.01<br>(0.08)                | 0.99<br>(0.08)      | 1.01<br>(0.00) | 1.69<br>(0.14)                | 0.60<br>(0.05)           | 1.00<br>(0.00) | 1.00<br>(0.08)                |

Mean and standard deviation (SD) for  $l_{approx}$ ,  $l_{mean}$  and the ratio  $l_{approx}/l_{mean}$  are shown over 200 simulation runs for gene-environment (GxE) interaction and marginal association analyses for two sample sizes,  $n = 1000$  and  $10000$ . M, genotype model (a: additive, r: recessive, d: dominant).  $b_G$ ,  $b_{GE}$  and  $b_Z$  are effect size parameters of genotype, gene-environment interaction and covariate, respectively; 0 and 1 denote absence and presence of effect.
