# Supplementary material for: Quick assessment for systematic test statistic inflation/deflation due to null model misspecifications in genome-wide environment interaction studies
Source: PubMed Central journal article supplement (PMC6638962; doi:10.1371/journal.pone.0219825), 2019-07-18
Supplement: pone.0219825.s011.pdf [file pone.0219825.s011.pdf]

# S1 Appendix: Technical details

## Derivation of approximation formula (7) in the main text

### Preliminary

Here we derive the approximation formula (7) in the main text. We have  $n$  samples with phenotypic value (binary, numeric value, or a factor) denoted by  $y_1, \dots, y_n$ , and  $L$  genetic variants,  $\mathbf{g}_l = (g_{l,1}, \dots, g_{l,n})^T$  for  $l = 1, \dots, L$ , which are to be tested for association with the phenotype. The tested variables at the  $l$ th locus are generically denoted as  $\mathbf{w}_{l,i}^T = (w_{l,i1}, \dots, w_{l,ip})$ , with  $p$  variables including the effect of  $\mathbf{g}_l$  itself or an interaction between  $\mathbf{g}_l$  and an environment variable. We also have  $q$  covariates (e.g. sex or age)  $\mathbf{z}_i^T = (z_{i1}, \dots, z_{iq})$  to be adjusted in common for all  $L$  tests. We consider  $L$  hypothesis tests of the null hypothesis  $H_{0l} : \beta_l = \mathbf{0}$  under the following regression model for the conditional mean of  $y_i$  with transformation,

$$\eta_i = \eta\{E(y_i | \mathbf{w}_{l,i}^T, \mathbf{z}_i^T)\} = \mathbf{w}_{l,i}^T \beta_l + \mathbf{z}_i^T \gamma_l, \quad (\text{S1})$$

for  $i = 1, \dots, n$ , where  $\eta$  is a monotone increasing function, and  $\beta_l^T = (\beta_{l,1}, \dots, \beta_{l,p})$  and  $\gamma_l^T = (\gamma_{l,1}, \dots, \gamma_{l,q})$  are the regression coefficients. The above model reduces to the ordinary linear regression model if  $\eta$  is the identity function and  $y_i$  follows a Gaussian distribution. The model reduces to the logistic regression model if  $\eta$  is the logit function and  $y_i$  follows a Bernoulli distribution.

We consider the  $l$ th genetic variant  $\mathbf{g}_l$  separately for  $l = 1, \dots, L$ , where  $n$  is the sample size. Let  $E_{\mathbf{g}_l}$  denote the expectation with respect to the marginal distribution of  $\mathbf{g}_l$ . The assumption is that, for a given  $l$ , genotypes  $g_{l,1}, \dots, g_{l,n}$  identically and independently follow a distribution whose all moments are finite, where the  $j$ th moment is denoted by  $\mu_{l,j} = E_{\mathbf{g}_l}(g_{l,i}^j)$ .

As shown in section “Influence of centering  $g_{l,i}$  and coding of  $\mathbf{x}_i$ ” of this S1 Appendix, subtracting any constant from  $g_{l,i}$  does not change the score test for testing  $\beta_l = 0$ . Thus, without loss of generality, we can assume that  $\mu_{l,1} = E_{\mathbf{g}_l}(g_{l,i}) = 0$  by subtracting the mean. We also denote the variance by  $\mu_{l,2} = \sigma_l^2$ . Let  $\mathbf{u} = (u_i)$ ,  $\mathbf{W}_l = (w_{l,ia})$  with  $w_{l,ia} = g_{l,i}x_{ia}$  ( $a = 1, \dots, p$ ), and  $\mathbf{Z} = (z_{ic})$  ( $c = 1, \dots, q$ ), in which  $i = 1, \dots, n$ , where  $\mathbf{u}$  depends on phenotype  $y_1, \dots, y_n$ ,  $x_{ia}$  is the  $a$ th environment variable for  $i$ th subject, and  $z_{ic}$  is the  $c$ th covariate for  $i$ th subject. We denote  $\widetilde{\mathbf{W}}_l = \boldsymbol{\Omega}^{1/2}\mathbf{W}_l$ ,  $\widetilde{\mathbf{Z}} = \boldsymbol{\Omega}^{1/2}\mathbf{Z}$ ,  $\widetilde{\mathbf{X}} = \boldsymbol{\Omega}^{1/2}\mathbf{X}$ ,  $\boldsymbol{\Omega} = \text{diag}(\omega_1, \dots, \omega_n)$ , the  $\omega_i$ s are positive values specific to the regression model. Then,  $\widetilde{w}_{l,ia} = g_{l,i}\widetilde{x}_{ia}$  ( $a = 1, \dots, p$ ). Let  $\mathbf{Q}_{\widetilde{\mathbf{Z}}} = \mathbf{I} - \mathbf{P}_{\widetilde{\mathbf{Z}}}$ , where  $\mathbf{P}_{\widetilde{\mathbf{Z}}} = \widetilde{\mathbf{Z}}(\widetilde{\mathbf{Z}}^T\widetilde{\mathbf{Z}})^{-1}\widetilde{\mathbf{Z}}^T$  is the projection onto  $\widetilde{\mathbf{Z}}$ . For the following arguments, we make assumptions that  $\max_{i,a} |\widetilde{x}_{ia}| < \infty$  and  $\max_i |u_i| < \infty$  as  $n \rightarrow \infty$ . We denote the equality by ignoring  $O(n^{-1})$  terms by ‘ $\approx$ ’.

Let  $A_l^{ab}$  and  $B_{l,ab}$  represent the  $(a, b)$ -element of matrixes  $\mathbf{A}_l^{-1}$  and  $\mathbf{B}_l$ , where

$$\mathbf{A}_l = \widetilde{\mathbf{W}}_l^T \mathbf{Q}_{\widetilde{\mathbf{Z}}} \widetilde{\mathbf{W}}_l \quad \text{and} \quad \mathbf{B}_l = \widetilde{\mathbf{W}}_l^T \mathbf{r} \mathbf{r}^T \widetilde{\mathbf{W}}_l,$$

respectively, in which

$$\mathbf{r} = \mathbf{Q}_{\widetilde{\mathbf{Z}}} \mathbf{u}.$$

Now we study the test statistic (1) in the main text,

$$\begin{aligned} t_l &= \mathbf{u}^T (\mathbf{Q}_{\widetilde{\mathbf{Z}}} \widetilde{\mathbf{W}}_l) (\widetilde{\mathbf{W}}_l^T \mathbf{Q}_{\widetilde{\mathbf{Z}}} \widetilde{\mathbf{W}}_l)^{-1} (\mathbf{Q}_{\widetilde{\mathbf{Z}}} \widetilde{\mathbf{W}}_l)^T \mathbf{u} \\ &= \text{tr}\{(\widetilde{\mathbf{W}}_l^T \mathbf{Q}_{\widetilde{\mathbf{Z}}} \widetilde{\mathbf{W}}_l)^{-1} (\mathbf{Q}_{\widetilde{\mathbf{Z}}} \widetilde{\mathbf{W}}_l)^T \mathbf{u} \mathbf{u}^T (\mathbf{Q}_{\widetilde{\mathbf{Z}}} \widetilde{\mathbf{W}}_l)\} \\ &= \text{tr}\{(\widetilde{\mathbf{W}}_l^T \mathbf{Q}_{\widetilde{\mathbf{Z}}} \widetilde{\mathbf{W}}_l)^{-1} (\widetilde{\mathbf{W}}_l^T \mathbf{r} \mathbf{r}^T \widetilde{\mathbf{W}}_l)\} \\ &= \text{tr}(\mathbf{A}_l^{-1} \mathbf{B}_l) \\ &= \sum_{a=1}^p \sum_{b=1}^p A_l^{ab} B_{l,ab}. \end{aligned}$$

Since we assumed that  $g_{l,i}$  is centered such that  $\mu_l = 0$ ,

$$E_{\mathbf{g}_l}(\mathbf{A}_l) = E_{\mathbf{g}_l}(\widetilde{\mathbf{W}}_l^T \mathbf{Q}_{\widetilde{\mathbf{Z}}} \widetilde{\mathbf{W}}_l) = E_{\mathbf{g}_l} \left\{ \sum_{i=1}^n \sum_{j=1}^n g_{l,i} g_{l,j} \widetilde{\mathbf{x}}_i \widetilde{\mathbf{x}}_j^T (\mathbf{Q}_{\widetilde{\mathbf{Z}}})_{ij} \right\} = \sigma_l^2 \sum_{i=1}^n \widetilde{\mathbf{x}}_i \widetilde{\mathbf{x}}_i^T (\mathbf{Q}_{\widetilde{\mathbf{Z}}})_{ii}$$

and

$$\begin{aligned}
E_{\mathbf{g}_l}(\mathbf{B}_l) &= E_{\mathbf{g}_l} \{ (\mathbf{Q}_{\bar{\mathbf{z}}} \widetilde{\mathbf{W}}_l)^T \mathbf{u} \mathbf{u}^T (\mathbf{Q}_{\bar{\mathbf{z}}} \widetilde{\mathbf{W}}_l) \} = E_{\mathbf{g}_l} \left\{ \sum_{i=1}^n \sum_{j=1}^n g_{l,i} g_{l,j} \tilde{\mathbf{x}}_i \tilde{\mathbf{x}}_j^T (\mathbf{Q}_{\bar{\mathbf{z}}} \mathbf{u})_i (\mathbf{Q}_{\bar{\mathbf{z}}} \mathbf{u})_j \right\} \\
&= \sigma_l^2 \sum_{i=1}^n \tilde{\mathbf{x}}_i \tilde{\mathbf{x}}_i^T (\mathbf{Q}_{\bar{\mathbf{z}}} \mathbf{u})_i^2.
\end{aligned}$$

Therefore, if the approximation

$$E_{\mathbf{g}_l}(t_l) \approx \text{tr}[\{E_{\mathbf{g}_l}(\mathbf{A}_l)\}^{-1} E_{\mathbf{g}_l}(\mathbf{B}_l)] \quad (\text{S2})$$

holds, the approximation formula (7) in the main text is derived.

In what follows, we verify eq. (S2). To this end, Let  $\bar{\mathbf{A}}_l = E_{\mathbf{g}_l}(\mathbf{A}_l)$  and  $\bar{\mathbf{B}}_l = E_{\mathbf{g}_l}(\mathbf{B}_l)$ . Then,

$$\begin{aligned}
E_{\mathbf{g}_l}(t_l) &= E_{\mathbf{g}_l} \{ \text{tr}(\mathbf{A}_l^{-1} \mathbf{B}_l) \} \\
&= E_{\mathbf{g}_l} (\text{tr}[\{\bar{\mathbf{A}}_l - (\bar{\mathbf{A}}_l - \mathbf{A}_l)\}^{-1} \mathbf{B}_l]) \\
&= E_{\mathbf{g}_l} (\text{tr}[\bar{\mathbf{A}}_l^{-1/2} \{\mathbf{I} - \bar{\mathbf{A}}_l^{-1/2} (\bar{\mathbf{A}}_l - \mathbf{A}_l) \bar{\mathbf{A}}_l^{-1/2}\}^{-1} \bar{\mathbf{A}}_l^{-1/2} \mathbf{B}_l]) \\
&= E_{\mathbf{g}_l} [\text{tr}\{(\mathbf{I} - \mathbf{M}_l)^{-1} \mathbf{N}_l\}] \\
&= E_{\mathbf{g}_l} [\text{tr}\{(\mathbf{I} + \sum_{m=1}^{\infty} \mathbf{M}_l^m) \mathbf{N}_l\}] \\
&= E_{\mathbf{g}_l} \{ \text{tr}(\mathbf{N}_l) \} + \sum_{m=1}^{\infty} E_{\mathbf{g}_l} \{ \text{tr}(\mathbf{M}_l^m \mathbf{N}_l) \}
\end{aligned} \quad (\text{S3})$$

where

$$\mathbf{M}_l = \mathbf{I} - \mathbf{L}_l, \quad \mathbf{L}_l = \bar{\mathbf{A}}_l^{-1/2} \mathbf{A}_l \bar{\mathbf{A}}_l^{-1/2} \quad \text{and} \quad \mathbf{N}_l = \bar{\mathbf{A}}_l^{-1/2} \mathbf{B}_l \bar{\mathbf{A}}_l^{-1/2}.$$

Also, define

$$\bar{\mathbf{L}}_l = E_{\mathbf{g}_l}(\mathbf{L}_l) = \bar{\mathbf{A}}_l^{-1/2} \bar{\mathbf{A}}_l \bar{\mathbf{A}}_l^{-1/2} \quad \text{and} \quad \bar{\mathbf{N}}_l = E_{\mathbf{g}_l}(\mathbf{N}_l) = \bar{\mathbf{A}}_l^{-1/2} \bar{\mathbf{B}}_l \bar{\mathbf{A}}_l^{-1/2}.$$

We express  $A_{l,ab} = (\mathbf{A}_l)_{ab}$  and  $B_{l,ab} = (\mathbf{B}_l)_{ab}$  in detail as follows.

$$\begin{aligned}
A_{l,ab} &= (\widetilde{\mathbf{W}}_l^T \mathbf{Q}_{\widetilde{\mathbf{Z}}} \widetilde{\mathbf{W}}_l)_{ab} = \sum_{i=1}^n \sum_{j=1}^n \widetilde{w}_{l,ia} \widetilde{w}_{l,jb} (\mathbf{Q}_{\widetilde{\mathbf{Z}}})_{ij} \\
&= \sum_{i=1}^n \sum_{j=1}^n g_{l,i} g_{l,j} \widetilde{x}_{l,ia} \widetilde{x}_{l,jb} (\mathbf{Q}_{\widetilde{\mathbf{Z}}})_{ij} = \sum_{i=1}^n \sum_{j=1}^n g_{l,i} g_{l,j} G_{l,ab,ij}, \\
B_{l,ab} &= (\widetilde{\mathbf{W}}_l^T \mathbf{r} \mathbf{r}^T \widetilde{\mathbf{W}}_l)_{ab} = \sum_{i=1}^n \sum_{j=1}^n \widetilde{w}_{l,ia} \widetilde{w}_{l,jb} (\mathbf{r} \mathbf{r}^T)_{ij} \\
&= \sum_{i=1}^n \sum_{j=1}^n g_{l,i} g_{l,j} \widetilde{x}_{ia} \widetilde{x}_{jb} (\mathbf{r} \mathbf{r}^T)_{ij} = \sum_{i=1}^n \sum_{j=1}^n g_{l,i} g_{l,j} F_{l,ab,ij},
\end{aligned}$$

in which

$$G_{l,ab,ij} = \widetilde{x}_{l,ia} \widetilde{x}_{l,jb} (\mathbf{Q}_{\widetilde{\mathbf{Z}}})_{ij} \quad \text{and} \quad F_{l,ab,ij} = \widetilde{x}_{l,ia} \widetilde{x}_{l,jb} (\mathbf{r} \mathbf{r}^T)_{ij}.$$

Because  $g_{l,i}$ s are identically and independently distributed with mean zero and variance  $\sigma_l^2$ , we have

$$\bar{A}_{l,ab} = \sum_{i=1}^n \sum_{j=1}^n E_{\mathbf{g}_l} (g_{l,i} g_{l,j}) G_{l,ab,ij} = \sigma_l^2 \sum_{i=1}^n G_{l,ab,ii} = \sigma_l^2 \sum_{i=1}^n \widetilde{x}_{ia} \widetilde{x}_{ib} (\mathbf{Q}_{\widetilde{\mathbf{Z}}})_{ii}, \quad (\text{S4})$$

$$\bar{B}_{l,ab} = \sum_{i=1}^n \sum_{j=1}^n E_{\mathbf{g}_l} (g_{l,i} g_{l,j}) F_{l,ab,ij} = \sigma_l^2 \sum_{i=1}^n F_{l,ab,ii} = \sigma_l^2 \sum_{i=1}^n \widetilde{x}_{ia} \widetilde{x}_{ib} (\mathbf{r} \mathbf{r}^T)_{ii}. \quad (\text{S5})$$

From the assumption that  $\max_{i,a} |\widetilde{x}_{ia}| < \infty$ ,

$$\left| \sum_{i=1}^n G_{l,ab,ii} \right| \leq \max_{i,a} |\widetilde{x}_{ia}|^2 \sum_{i=1}^n (\mathbf{Q}_{\widetilde{\mathbf{Z}}})_{ii} = \max_{i,a} |\widetilde{x}_{ia}|^2 (n - q) = O(n),$$

which implies that  $\bar{\mathbf{A}}_l = O(n)$ , and hence,  $\bar{\mathbf{A}}_l^{-1/2} = O(n^{-1/2})$ . Similarly, by  $\max_i |u_i| < \infty$ ,

$$\begin{aligned}
\left| \sum_{i=1}^n F_{l,ab,ii} \right| &\leq \max_{i,a} |\widetilde{x}_{ia}|^2 \|\mathbf{r}\|^2 = \max_{i,a} |\widetilde{x}_{ia}|^2 \|\mathbf{Q}_{\widetilde{\mathbf{Z}}} \mathbf{u}\|^2 \\
&\leq \max_{i,a} |\widetilde{x}_{ia}|^2 \|\mathbf{u}\|^2 \leq \max_{i,a} |\widetilde{x}_{ia}|^2 \max_i |u_i|^2 n = O(n),
\end{aligned}$$

which implies that  $\bar{\mathbf{B}}_l = O(n)$ .

Define  $\widetilde{x}_{ia}^* = \sum_{c=1}^p (\bar{\mathbf{A}}_l^{-1/2})_{ac} \widetilde{x}_{ic}$ . By the assumption that  $\max_{i,a} |\widetilde{x}_{ia}| < \infty$  as well

as that  $\bar{\mathbf{A}}_l^{-1/2} = O(n^{-1/2})$ , we have

$$\max_{i,a} |\tilde{x}_{ia}^*| = O(n^{-1/2}). \quad (\text{S6})$$

Then, let

$$\begin{aligned} G_{l,ab,ij}^* &= \sum_{c=1}^p \sum_{d=1}^p (\bar{\mathbf{A}}_l^{-1/2})_{ac} (\bar{\mathbf{A}}_l^{-1/2})_{bd} G_{l,cd,ij} = \tilde{x}_{ia}^* \tilde{x}_{jb}^* (\mathbf{Q}_{\bar{\mathbf{z}}})_{ij}, \\ F_{l,ab,ij}^* &= \sum_{c=1}^p \sum_{d=1}^p (\bar{\mathbf{A}}_l^{-1/2})_{ac} (\bar{\mathbf{A}}_l^{-1/2})_{bd} F_{l,cd,ij} = \tilde{x}_{ia}^* \tilde{x}_{jb}^* (\mathbf{r}\mathbf{r}^T)_{ij}, \end{aligned}$$

and then,

$$\begin{aligned} L_{l,ab} &= (\bar{\mathbf{A}}_l^{-1/2} \mathbf{A}_l \bar{\mathbf{A}}_l^{-1/2})_{ab} = \sum_{i=1}^n \sum_{j=1}^n g_{l,i} g_{l,j} G_{l,ab,ij}^*, \\ N_{l,ab} &= (\bar{\mathbf{A}}_l^{-1/2} \mathbf{B}_l \bar{\mathbf{A}}_l^{-1/2})_{ab} = \sum_{i=1}^n \sum_{j=1}^n g_{l,i} g_{l,j} F_{l,ab,ij}^*. \end{aligned}$$

Therefore, we have

$$\bar{L}_{l,ab} = \sigma_l^2 \sum_{i=1}^n G_{l,ab,ii}^* \quad \text{and} \quad \bar{N}_{l,ab} = \sigma_l^2 \sum_{i=1}^n F_{l,ab,ii}^*, \quad (\text{S7})$$

both of which are of order  $O(1)$  by the similar arguments above:

$$\left| \sum_{i=1}^n G_{l,ab,ii}^* \right| \leq \max_{i,a} |\tilde{x}_{ia}^*|^2 O(n) = O(1),$$

and

$$\left| \sum_{i=1}^n F_{l,ab,ii}^* \right| \leq \max_{i,a} |\tilde{x}_{ia}^*|^2 O(n) = O(1).$$

## Derivation

Now recall eq. (S3),

$$E_{\mathbf{g}_i}(t_l) = E_{\mathbf{g}_i} \{ \text{tr}(\mathbf{N}_l) \} + \sum_{m=1}^{\infty} E_{\mathbf{g}_i} \{ \text{tr}(\mathbf{M}_l^m \mathbf{N}_l) \}.$$

We will show that the first term is the dominant term being of order  $O(1)$ , and, consequently,

$$E_{\mathbf{g}_l}(t_l) \approx E_{\mathbf{g}_l}\{\text{tr}(\mathbf{N}_l)\},$$

which is of order  $O(1)$ .

**The first term:** We immediately have that

$$E_{\mathbf{g}_l}\{\text{tr}(\mathbf{N}_l)\} = \text{tr}(\bar{\mathbf{N}}_l) = \text{tr}(\bar{\mathbf{A}}_l^{-1/2}\bar{\mathbf{B}}_l\bar{\mathbf{A}}_l^{-1/2}) = \text{tr}(\bar{\mathbf{A}}_l^{-1}\bar{\mathbf{B}}_l),$$

the order of which is  $O(1)$  as shown in (S7) below.

**The second term:** In what follows, we use induction to show that

$$E_{\mathbf{g}_l}\{\text{tr}(\mathbf{M}_l^m \mathbf{N}_l)\} \approx 0$$

for any  $m \geq 1$ , which implies that the second term is negligible. As the induction step, first, we show that  $E_{\mathbf{g}_l}\{\text{tr}(\mathbf{M}_l^m \mathbf{N}_l)\} \approx 0$  for  $m = 1$  and 2. Subsequently, assuming that  $E_{\mathbf{g}_l}\{\text{tr}(\mathbf{M}_l^s \mathbf{N}_l)\} \approx 0$  is true for any  $s < m$ , we show that  $E_{\mathbf{g}_l}\{\text{tr}(\mathbf{M}_l^m \mathbf{N}_l)\} \approx 0$  holds.

**For  $m = 1$ :** We have that

$$E_{\mathbf{g}_l}\{\text{tr}(\mathbf{M}_l \mathbf{N}_l)\} = \text{tr}(\bar{\mathbf{N}}_l) - E_{\mathbf{g}_l}\{\text{tr}(\mathbf{L}_l \mathbf{N}_l)\}.$$

Because  $g_{l,i}$ s are independently and identically distributed random variables with zero mean and finite variance, for given coefficients  $\xi_{i,j}$ , we have

$$\sum_{i=1}^n \sum_{j=1}^n \xi_{i,j} E_{\mathbf{g}_l}(g_{l,i} g_{l,j}) = \sum_{i=1}^n \sum_{j=1}^n \sigma_l^2 \xi_{i,j} 1_{\{i=j\}} = \sigma_l^2 \sum_{i=1}^n \xi_{i,i}.$$

Similarly, for given coefficients  $\xi_{i,j}$  and  $\psi_{i,j}$ , we have

$$\begin{aligned}
& \sum_{i_1=1}^n \sum_{j_1=1}^n \sum_{i=1}^n \sum_{j=1}^n \xi_{i_1,j_1} \psi_{i,j} E_{\mathbf{g}_l}(g_{l,i_1} g_{l,j_1} g_{l,i} g_{l,j}) \\
&= \sum_{i_1=1}^n \sum_{j_1=1}^n \sum_{i=1}^n \sum_{j=1}^n \xi_{i_1,j_1} \psi_{i,j} \{ \mu_{l,4} 1_{\{i_1=j_1=i=j\}} + \sigma_l^4 (1_{\{i_1=j_1 \neq i=j\}} + 1_{\{i_1=i \neq j_1=j\}} + 1_{\{i_1=j \neq j_1=i\}}) \} \\
&= \mu_{l,4} \sum_{i=1}^n \xi_{i,i} \psi_{i,i} + \sigma_l^4 \sum_{i=1}^n \sum_{j=1, i \neq j}^n (\xi_{i_1,i_1} \psi_{i,i} + \xi_{i_1,i} \psi_{i_1,i} + \xi_{i_1,i} \psi_{i,i_1}). \tag{S8}
\end{aligned}$$

The second term is expressed as

$$\begin{aligned}
& E_{\mathbf{g}_l} \{ \text{tr}(\mathbf{L}_l \mathbf{N}_l) \} \\
&= \sum_{a=1}^p \sum_{b=1}^p E_{\mathbf{g}_l} \left( \sum_{i_1=1}^n \sum_{j_1=1}^n \sum_{i=1}^n \sum_{j=1}^n g_{l,i_1} g_{l,j_1} g_{l,i} g_{l,j} G_{l,ab,i_1 j_1}^* F_{l,ab,ij}^* \right) \\
&\approx \sum_{a=1}^p \sum_{b=1}^p E_{\mathbf{g}_l} \left( \sum_{i_1=j_1 \neq i=j} g_{l,i_1} g_{l,j_1} g_{l,i} g_{l,j} G_{l,ab,i_1 j_1}^* F_{l,ab,ij}^* \right. \\
&\quad \left. + \sum_{i_1=i \neq j_1=j} g_{l,i_1} g_{l,j_1} g_{l,i} g_{l,j} G_{l,ab,i_1 j_1}^* F_{l,ab,ij}^* + \sum_{i_1=j \neq j_1=i} g_{l,i_1} g_{l,j_1} g_{l,i} g_{l,j} G_{l,ab,i_1 j_1}^* F_{l,ab,ij}^* \right) \\
&\approx \sigma_l^4 \sum_{a=1}^p \sum_{b=1}^p \left( \sum_{i=1}^n G_{l,ab,ii}^* \sum_{i=1}^n F_{l,ab,ii}^* + \sum_{i=1}^n \sum_{j=1}^n G_{l,ab,ij}^* F_{l,ab,ij}^* + \sum_{i=1}^n \sum_{j=1}^n G_{l,ab,ij}^* F_{l,ab,ji}^* \right) \\
&\approx \sigma_l^4 \sum_{a=1}^p \sum_{b=1}^p \sum_{i=1}^n G_{l,ab,ii}^* \sum_{i=1}^n F_{l,ab,ii}^* \\
&= \sum_{a=1}^p \sum_{b=1}^p \bar{L}_{l,ab} \bar{N}_{l,ab} \\
&= \text{tr}(\bar{\mathbf{L}}_l \bar{\mathbf{N}}_l) \\
&= \text{tr}(\bar{\mathbf{A}}_l^{-1/2} \bar{\mathbf{A}}_l \bar{\mathbf{A}}_l^{-1/2} \bar{\mathbf{A}}_l^{-1/2} \bar{\mathbf{B}}_l \bar{\mathbf{A}}_l^{-1/2}) \\
&= \text{tr}(\bar{\mathbf{A}}_l^{-1/2} \bar{\mathbf{B}}_l \bar{\mathbf{A}}_l^{-1/2}) \\
&= \text{tr}(\bar{\mathbf{N}}_l).
\end{aligned}$$

In the above, the approximations in the second and third line is due to (S8) with

$$\xi_{i_1,j_1} = G_{l,ab,i_1 j_1}^* \text{ and } \psi_{i,j} = F_{l,ab,ij}^*, \mu_{l,4} < \infty \text{ and}$$

$$\sum_{i=1}^n G_{l,ab,ii}^* F_{l,cd,ii}^* = O(n^{-1}), \tag{S9}$$

for any  $a, b, c, d$ . (S9) is the special case of (S15) when  $s = 1$  given in the following subsection. The approximation in the fourth line is due to

$$\sum_{i=1}^n \sum_{j=1}^n G_{l,ab,ij}^* F_{l,cd,ij}^* = O(n^{-1}), \quad (\text{S10})$$

for any  $a, b, c, d$ , which is shown in the following subsection. Therefore,

$$E_{\mathbf{g}_l} \{\text{tr}(\mathbf{M}_l \mathbf{N}_l)\} \approx \text{tr}(\bar{\mathbf{N}}_l) - \text{tr}(\bar{\mathbf{N}}_l) = 0.$$

**For  $m = 2$ :** We have that

$$\begin{aligned} E_{\mathbf{g}_l} \{\text{tr}(\mathbf{M}_l^2 \mathbf{N}_l)\} &= E_{\mathbf{g}_l} [\text{tr}\{(\mathbf{I} - \mathbf{L}_l)^2 \mathbf{N}_l\}] = E_{\mathbf{g}_l} [\text{tr}\{(\mathbf{I} - 2\mathbf{L}_l + \mathbf{L}_l^2) \mathbf{N}_l\}] \\ &= \text{tr}(\bar{\mathbf{N}}_l) - 2E_{\mathbf{g}_l} \{\text{tr}(\mathbf{L}_l \mathbf{N}_l)\} + E_{\mathbf{g}_l} \{\text{tr}(\mathbf{L}_l^2 \mathbf{N}_l)\} \\ &\approx -\text{tr}(\bar{\mathbf{N}}_l) + E_{\mathbf{g}_l} \{\text{tr}(\mathbf{L}_l^2 \mathbf{N}_l)\}, \end{aligned}$$

where we used the previous result  $E_{\mathbf{g}_l} \{\text{tr}(\mathbf{L}_l \mathbf{N}_l)\} \approx \text{tr}(\bar{\mathbf{N}}_l)$ .

Let  $\mathcal{F}_{2,m,n}$  be the set of all partitions in which any pairing of two indexes is equal among  $2m + 2$  indexes  $(i_1, j_1, i_2, j_2, \dots, i_m, j_m, i, j) \in \{1, 2, \dots, n\}^{2(m+1)}$  but different pairs are distinct, which is equivalent to making  $m + 1$  unordered subset of 2 elements from  $2m + 2$  elements. For example,

$$\begin{aligned} \mathcal{F}_{2,1,n} \\ &= \{(i_1, j_1, i, j) \in \{1, 2, \dots, n\}^4 : \{i_1 = j_1 \neq i = j\} \cup \{i_1 = i \neq j_1 = j\} \cup \{i_1 = j \neq j_1 = i\}\}, \end{aligned}$$

which corresponds to the index set appearing in summation in the second line of (S8),



and

$\mathcal{F}_{2,2,n}$

$$\begin{aligned}
&= \{(i_1, j_1, i_2, j_2, i, j) \in \{1, 2, \dots, n\}^6 : \\
&\{i_1 = j_1 \neq i_2 = j_2 \neq i = j\} \cup \{i_1 = j_1 \neq i_2 = i \neq j_2 = j\} \cup \{i_1 = j_1 \neq i_2 = j \neq j_2 = i\} \cup \\
&\{i_1 = j \neq i_2 = j_2 \neq i = j_1\} \cup \{i_1 = j \neq i_2 = i \neq j_2 = j_1\} \cup \{i_1 = j \neq i_2 = j_1 \neq j_2 = i\} \cup \\
&\{i_1 = j_2 \neq i_2 = j_1 \neq i = j\} \cup \{i_1 = j_2 \neq i_2 = i \neq j_1 = j\} \cup \{i_1 = j_2 \neq i_2 = j \neq j_1 = i\} \cup \\
&\{i_1 = i \neq i_2 = j_2 \neq j_1 = j\} \cup \{i_1 = i \neq i_2 = j_1 \neq j_2 = j\} \cup \{i_1 = i \neq i_2 = j \neq j_2 = j_1\} \cup \\
&\{i_1 = i_2 \neq i = j_2 \neq j_1 = j\} \cup \{i_1 = i_2 \neq i = j_1 \neq j_2 = j\} \cup \{i_1 = i_2 \neq i = j \neq j_2 = j_1\}\}.
\end{aligned} \tag{S11}$$

Analogous to (S8), for given coefficients  $\xi_{i,j}$ ,  $\psi_{i,j}$  and  $\phi_{i,j}$ , we have

$$\begin{aligned}
&\sum_{i_1=1}^n \sum_{j_1=1}^n \sum_{i_2=1}^n \sum_{j_2=1}^n \sum_{i=1}^n \sum_{j=1}^n \xi_{i_1, j_1} \psi_{i_2, j_2} \phi_{i, j} E_{\mathbf{g}_l}(g_{l, i_1} g_{l, j_1} g_{l, i_2} g_{l, j_2} g_{l, i} g_{l, j}) \\
&= \sum_{i_1=1}^n \sum_{j_1=1}^n \sum_{i_2=1}^n \sum_{j_2=1}^n \sum_{i=1}^n \sum_{j=1}^n \xi_{i_1, j_1} \psi_{i_2, j_2} \phi_{i, j} \{\mu_{l, 6} \mathbf{1}_{\{i_1=j_1=i_2=j_2=i=j\}} \\
&+ \sigma_l^2 \mu_{l, 4} (\mathbf{1}_{\{i_1=j_1 \neq i_2=j_2=i=j\}} + \mathbf{1}_{\{i_1=j_2 \neq i_2=j=j_1=i\}} + \mathbf{1}_{\{i_1=j \neq i_2=j_2=i=j_1\}} + \mathbf{1}_{\{i_1=i_2 \neq j_1=j_2=i=j\}} \\
&+ \mathbf{1}_{\{i_1=i \neq i_2=j_2=i=j_1\}} + \mathbf{1}_{\{i_2=i \neq i_1=j_1=j_2=j\}} + \mathbf{1}_{\{i_2=j_1 \neq i_1=j_2=i=j\}} + \mathbf{1}_{\{i_2=j_2 \neq i_1=j=j_1=i\}} \\
&+ \mathbf{1}_{\{i_2=j \neq i_1=j_2=i=j_1\}} + \mathbf{1}_{\{i=j_1 \neq i_2=j_2=i_1=j\}} + \mathbf{1}_{\{i=j_2 \neq i_2=j_1=i_1=j\}} + \mathbf{1}_{\{i=j \neq i_2=j_1=i_1=j_2\}} \\
&+ \mathbf{1}_{\{j_1=j_2 \neq i_2=i_1=i=j\}} + \mathbf{1}_{\{j_1=j \neq i_2=i_1=i=j_2\}} + \mathbf{1}_{\{j_2=j \neq i_2=i_1=i=j_1\}}) \\
&+ \sigma_l^6 (\mathbf{1}_{\{i_1=j_1 \neq i_2=j_2 \neq i=j\}} + \mathbf{1}_{\{i_1=j_1 \neq i_2=i \neq j_2=j\}} + \mathbf{1}_{\{i_1=j_1 \neq i_2=j \neq j_2=i\}} \\
&+ \mathbf{1}_{\{i_1=j \neq i_2=j_2 \neq i=j_1\}} + \mathbf{1}_{\{i_1=j \neq i_2=i \neq j_2=j_1\}} + \mathbf{1}_{\{i_1=j \neq i_2=j_1 \neq j_2=i\}} \\
&+ \mathbf{1}_{\{i_1=j_2 \neq i_2=j_1 \neq i=j\}} + \mathbf{1}_{\{i_1=j_2 \neq i_2=i \neq j_1=j\}} + \mathbf{1}_{\{i_1=j_2 \neq i_2=j \neq j_1=i\}} \\
&+ \mathbf{1}_{\{i_1=i \neq i_2=j_2 \neq j_1=j\}} + \mathbf{1}_{\{i_1=i \neq i_2=j_1 \neq j_2=j\}} + \mathbf{1}_{\{i_1=i \neq i_2=j \neq j_2=j_1\}} \\
&+ \mathbf{1}_{\{i_1=i_2 \neq i=j_2 \neq j_1=j\}} + \mathbf{1}_{\{i_1=i_2 \neq i=j_1 \neq j_2=j\}} + \mathbf{1}_{\{i_1=i_2 \neq i=j \neq j_2=j_1\}}) \}.
\end{aligned} \tag{S12}$$

Using (S12) and (S11), the second term is expressed as

$$\begin{aligned}
& E_{\mathbf{g}_l} \{ \text{tr}(\mathbf{L}_l^2 \mathbf{N}_l) \} \\
&= \sum_{a=1}^p \sum_{b=1}^p \sum_{c=1}^p E_{\mathbf{g}_l} \left( \sum_{i_1=1}^n \sum_{j_1=1}^n \sum_{i_2=1}^n \sum_{j_2=1}^n \sum_{i=1}^n \sum_{j=1}^n g_{l,i_1} g_{l,j_1} g_{l,i_2} g_{l,j_2} g_{l,i} g_{l,j} G_{l,ab,i_1 j_1}^* G_{l,bc,i_2 j_2}^* F_{l,ca,ij}^* \right) \\
&\approx \sum_{a=1}^p \sum_{b=1}^p \sum_{c=1}^p E_{\mathbf{g}_l} \left( \sum_{(i_1, j_1, i_2, j_2, i, j) \in \mathcal{F}_{2,2,n}} g_{l,i_1} g_{l,j_1} g_{l,i_2} g_{l,j_2} g_{l,i} g_{l,j} G_{l,ab,i_1 j_1}^* G_{l,bc,i_2 j_2}^* F_{l,ca,ij}^* \right) \\
&\approx \sigma_l^6 \sum_{a=1}^p \sum_{b=1}^p \sum_{c=1}^p \sum_{i_1=1}^n \sum_{i_2=1}^n \sum_{i=1}^n G_{l,ab,i_1 i_1}^* G_{l,bc,i_2 i_2}^* F_{l,ca,ii}^* \\
&= \text{tr}(\bar{\mathbf{L}}_l^2 \bar{\mathbf{N}}_l) \\
&= \text{tr}(\bar{\mathbf{A}}_l^{-1/2} \bar{\mathbf{A}}_l \bar{\mathbf{A}}_l^{-1/2} \bar{\mathbf{A}}_l^{-1/2} \bar{\mathbf{A}}_l \bar{\mathbf{A}}_l^{-1/2} \bar{\mathbf{N}}_l) \\
&= \text{tr}(\bar{\mathbf{L}}_l \bar{\mathbf{N}}_l) \\
&= \text{tr}(\bar{\mathbf{N}}_l).
\end{aligned}$$

For the approximation in the second line, we used (S8), (S9) and (S15) when  $s = 2$ , i.e.

$$\sum_{i=1}^n G_{l,ab,ii}^* G_{l,bc,ii}^* F_{l,ca,ii}^* = O(n^{-2}), \quad (\text{S13})$$

combined with  $\mu_{l,6} < \infty$ . Also, in the third line, we used (S10) and

$$\sum_{i=1}^n \sum_{j=1}^n G_{l,ab,ij}^* G_{l,cd,ij}^* = O(n^{-1}), \quad (\text{S14})$$

which is shown in the following subsection, making the summations over the

constraints in  $\mathcal{F}_{2,2,n}$  being of  $O(n^{-1})$  except for the set

$\{(i_1, j_1, i_2, j_2, i, j) : i_1 = j_1 \neq i_2 = j_2 \neq i = j\}$ . Therefore,

$$E_{\mathbf{g}_l} \{ \text{tr}(\mathbf{M}_l^2 \mathbf{N}_l) \} \approx -\text{tr}(\bar{\mathbf{N}}_l) + \text{tr}(\bar{\mathbf{N}}_l) = 0.$$

**For general  $m$ :** For induction, assume that

$$E_{\mathbf{g}_l} \{ \text{tr}(\mathbf{L}_l^s \mathbf{N}_l) \} \approx \text{tr}(\bar{\mathbf{N}}_l)$$

is true for any  $s < m$ . Then, by the above induction assumption,

$$\begin{aligned}
E_{\mathbf{g}_l} \{ \text{tr}(\mathbf{M}_l^m \mathbf{N}_l) \} &= E_{\mathbf{g}_l} [ \text{tr} \{ (\mathbf{I} - \mathbf{L}_l)^m \mathbf{N}_l \} ] \\
&= E_{\mathbf{g}_l} \left[ \text{tr} \left\{ \sum_{s=0}^m (-1)^s \mathbf{L}_l^s \mathbf{N}_l \right\} \right] \\
&= \sum_{s=0}^{m-1} (-1)^s E_{\mathbf{g}_l} \{ \text{tr}(\mathbf{L}_l^s \mathbf{N}_l) \} + (-1)^m E_{\mathbf{g}_l} \{ \text{tr}(\mathbf{L}_l^m \mathbf{N}_l) \} \\
&\approx \sum_{s=0}^{m-1} (-1)^s \text{tr}(\bar{\mathbf{N}}_l) + (-1)^m E_{\mathbf{g}_l} \{ \text{tr}(\mathbf{L}_l^m \mathbf{N}_l) \}.
\end{aligned}$$

Then, by letting  $\mathcal{P} = \{1, \dots, p\}$  and  $\mathcal{N} = \{1, \dots, n\}$ ,

$$\begin{aligned}
&E_{\mathbf{g}_l} \{ \text{tr}(\mathbf{L}_l^m \mathbf{N}_l) \} \\
&= \sum_{(a, a_1, a_2, \dots, a_m) \in \mathcal{P}^{m+1}} E_{\mathbf{g}_l} \left( \sum_{(i_1, j_1, i_2, j_2, \dots, i_m, j_m, i, j) \in \mathcal{N}^{2m+2}} g_{l, i_1} g_{l, j_1} g_{l, i_2} g_{l, j_2} \cdots g_{l, i_m} g_{l, j_m} g_{l, i} g_{l, j} \right. \\
&\quad \left. \times G_{l, a a_1, i_1 j_1}^* G_{l, a_1 a_2, i_2 j_2}^* \cdots G_{l, a_{m-1} a_m, i_m j_m}^* F_{l, a_m a, i j}^* \right) \\
&\approx \sum_{(a, a_1, a_2, \dots, a_m) \in \mathcal{P}^{m+1}} E_{\mathbf{g}_l} \left( \sum_{(i_1, j_1, i_2, j_2, \dots, i_m, j_m, i, j) \in \mathcal{F}_{2, m, n}} g_{l, i_1} g_{l, j_1} g_{l, i_2} g_{l, j_2} \cdots g_{l, i_m} g_{l, j_m} g_{l, i} g_{l, j} \right. \\
&\quad \left. \times G_{l, a a_1, i_1 j_1}^* G_{l, a_1 a_2, i_2 j_2}^* \cdots G_{l, a_{m-1} a_m, i_m j_m}^* F_{l, a_m a, i j}^* \right) \\
&\approx \sum_{(a, a_1, a_2, \dots, a_m) \in \mathcal{P}^{m+1}} \sigma_l^{2(m+1)} \sum_{(i_1, i_2, \dots, i_m, i) \in \mathcal{N}^{m+1}} G_{l, a a_1, i_1 i_1}^* G_{l, a_1 a_2, i_2 i_2}^* \cdots G_{l, a_{m-1} a_m, i_m i_m}^* F_{l, a_m a, i i}^* \\
&= \text{tr}(\bar{\mathbf{L}}_l^m \bar{\mathbf{N}}_l) \\
&= \text{tr}(\bar{\mathbf{N}}_l),
\end{aligned}$$

in which we used (S10) and (S14) as in the case of  $m = 2$ . Therefore, for any  $m$ , we have that  $E_{\mathbf{g}_l} \{ \text{tr}(\mathbf{L}_l^m \mathbf{N}_l) \} \approx \text{tr}(\bar{\mathbf{N}}_l)$ , and that

$$E_{\mathbf{g}_l} \{ \text{tr}(\mathbf{M}_l^m \mathbf{N}_l) \} \approx \left\{ \sum_{s=0}^{m-1} (-1)^s + (-1)^m \right\} \text{tr}(\bar{\mathbf{N}}_l) = (1 - 1)^m \text{tr}(\bar{\mathbf{N}}_l) = 0.$$

Finally, it follows from (S3) that

$$E_{\mathbf{g}_l}(t_l) \approx \text{tr}(\bar{\mathbf{N}}_l) = \text{tr}(\bar{\mathbf{A}}_l^{-1} \bar{\mathbf{B}}_l) = \text{tr}(\bar{\mathbf{A}}_{l, (0)}^{-1} \bar{\mathbf{B}}_{l, (0)}),$$

where the last equality is due to (S4) and (S5), and the elements of  $\mathbf{A}_{l,(0)}$  and  $\mathbf{B}_{l,(0)}$  are defined by

$$(\bar{\mathbf{A}}_{l,(0)})_{ab} = \sum_{i=1}^n \tilde{x}_{ia} \tilde{x}_{ib} (\mathbf{Q}_{\bar{\mathbf{z}}})_{ii} \quad \text{and} \quad (\bar{\mathbf{B}}_{l,(0)})_{ab} = \sum_{i=1}^n \tilde{x}_{ia} \tilde{x}_{ib} (\mathbf{Q}_{\bar{\mathbf{z}}})_{ii}^2,$$

giving the approximation formula (7) in the main text.

## Technical results

For any  $s \geq 1$ , because  $(\mathbf{Q}_{\bar{\mathbf{z}}})_{ii} = 1 - (\mathbf{P}_{\bar{\mathbf{z}}})_{ii} \in [0, 1]$  and hence  $(\mathbf{Q}_{\bar{\mathbf{z}}})_{ii}^s \leq 1$ ,

$$\begin{aligned} \left| \sum_{i=1}^n G_{l,a_1 b_1, ii}^* \cdots G_{l,a_s b_s, ii}^* \cdot F_{l,cd, ii}^* \right| &= \left| \sum_{i=1}^n \{ \tilde{x}_{ia_1}^* \tilde{x}_{ib_1}^* (\mathbf{Q}_{\bar{\mathbf{z}}})_{ii} \} \cdots \{ \tilde{x}_{ia_s}^* \tilde{x}_{ib_s}^* (\mathbf{Q}_{\bar{\mathbf{z}}})_{ii} \} \cdot (\tilde{x}_{ic}^* \tilde{x}_{id}^* r_i^2) \right| \\ &\leq \max_{i,a} |\tilde{x}_{ia}^*|^{2s+2} \sum_{i=1}^n (\mathbf{Q}_{\bar{\mathbf{z}}})_{ii}^s r_i^2 \\ &\leq \max_{i,a} |\tilde{x}_{ia}^*|^{2s+2} \|\mathbf{r}\|^2 \\ &= O(n^{-s-1}) O(n) = O(n^{-s}). \end{aligned} \tag{S15}$$

**Derivation of (S10)** To see that (S10) holds, letting  $v_{iac} = \tilde{x}_{ia}^* \tilde{x}_{ic}^* r_i$ , by the Cauchy–Schwarz inequality,

$$\begin{aligned} \left| \sum_{i=1}^n \sum_{j=1}^n G_{ab, ij}^* F_{cd, ij}^* \right| &= \left| \sum_{i=1}^n \sum_{j=1}^n (\tilde{x}_{ia}^* \tilde{x}_{ic}^* r_i) (\tilde{x}_{jb}^* \tilde{x}_{jd}^* r_j) (\mathbf{Q}_{\bar{\mathbf{z}}})_{ij} \right| \\ &= |\mathbf{v}_{ac}^T \mathbf{Q}_{\bar{\mathbf{z}}} \mathbf{v}_{bd}| \\ &= |(\mathbf{Q}_{\bar{\mathbf{z}}} \mathbf{v}_{ac})^T (\mathbf{Q}_{\bar{\mathbf{z}}} \mathbf{v}_{bd})| \\ &\leq \|\mathbf{Q}_{\bar{\mathbf{z}}} \mathbf{v}_{ac}\| \|\mathbf{Q}_{\bar{\mathbf{z}}} \mathbf{v}_{bd}\|. \end{aligned}$$

Here,

$$\begin{aligned} \|\mathbf{Q}_{\bar{\mathbf{z}}} \mathbf{v}_{ac}\|^2 &\leq \|\mathbf{v}_{ac}\|^2 = \sum_{i=1}^n (\tilde{x}_{ia}^* \tilde{x}_{ic}^* r_i)^2 \\ &\leq \max_{i,a} |\tilde{x}_{ia}^*|^4 \|\mathbf{r}\|^2 = \max_{i,a} |\tilde{x}_{ia}^*|^4 \|\mathbf{Q}_{\bar{\mathbf{z}}} \mathbf{u}\|^2 \\ &\leq \max_{i,a} |\tilde{x}_{ia}^*|^4 \|\mathbf{u}\|^2 = O(n^{-2}) O(n) = O(n^{-1}). \end{aligned}$$

Thus,

$$\sum_{i=1}^n \sum_{j=1}^n G_{l,ab,ij}^* F_{l,cd,ij}^* = O(n^{-1})$$

which is (S10).

**Derivation of (S14)** To see that (S14) holds,

$$\begin{aligned} \left| \sum_{i=1}^n \sum_{j=1}^n G_{l,ab,ij}^* G_{l,cd,ij}^* \right| &= \left| \sum_{i=1}^n \sum_{j=1}^n (\tilde{x}_{ia}^* \tilde{x}_{ic}^*) (\tilde{x}_{jb}^* \tilde{x}_{jd}^*) (\mathbf{Q}_{\tilde{\mathbf{Z}}})_{ij}^2 \right| \\ &\leq \sum_{i=1}^n \sum_{j=1}^n |(\tilde{x}_{ia}^* \tilde{x}_{ic}^*) (\tilde{x}_{jb}^* \tilde{x}_{jd}^*)| (\mathbf{Q}_{\tilde{\mathbf{Z}}})_{ij}^2 \\ &\leq \max_{i,a} |\tilde{x}_{ia}^*|^4 \sum_{i=1}^n \sum_{j=1}^n (\mathbf{Q}_{\tilde{\mathbf{Z}}})_{ij}^2 = \max_{i,a} |\tilde{x}_{ia}^*|^4 \text{tr}(\mathbf{Q}_{\tilde{\mathbf{Z}}}^2) \\ &= \max_{i,a} |\tilde{x}_{ia}^*|^4 \text{tr}(\mathbf{Q}_{\tilde{\mathbf{Z}}}) \leq O(n^{-2})O(n) = O(n^{-1}). \end{aligned}$$

Consequently,

$$\sum_{i=1}^n \sum_{j=1}^n G_{l,ab,ij}^* G_{l,cd,ij}^* = O(n^{-1})$$

which is (S14).

## $l_{approx}$ is close to one under correct null model

Consider the score statistic  $t_l$  under the loglikelihood function  $\ell = \ell(\eta_1, \dots, \eta_n)$  and  $u_i = (\partial/\partial\eta_i)\ell/\omega_i^{1/2}$  with  $\omega_i = -(\partial^2/\partial^2\eta_i)\ell$ . If the model is correct and  $n$  is large, by the Bartlett identity,  $E[\{(\partial/\partial\eta_i)\ell\}\{(\partial/\partial\eta_{i'})\ell\}] = -E\{(\partial^2/\partial^2\eta_i)\ell\}1_{i=i'} = \omega_i 1_{i=i'}$ , then,  $\sum_{i=1}^n \tilde{\mathbf{x}}_i \tilde{\mathbf{x}}_i^T (\mathbf{Q}_{\tilde{\mathbf{Z}}})_{ii}^2 \approx \sum_{i=1}^n \tilde{\mathbf{x}}_i \tilde{\mathbf{x}}_i^T \{\mathbf{Q}_{\tilde{\mathbf{Z}}} E(\mathbf{u}\mathbf{u}^T) \mathbf{Q}_{\tilde{\mathbf{Z}}}\}_{ii} = \sum_{i=1}^n \tilde{\mathbf{x}}_i \tilde{\mathbf{x}}_i^T (\mathbf{Q}_{\tilde{\mathbf{Z}}} \mathbf{I} \mathbf{Q}_{\tilde{\mathbf{Z}}})_{ii} = \sum_{i=1}^n \tilde{\mathbf{x}}_i \tilde{\mathbf{x}}_i^T (\mathbf{Q}_{\tilde{\mathbf{Z}}})_{ii}$ . Hence,  $t_{approx}$  approximates  $p$ , and  $l_{approx}$  is close to one if the model is correct.

## Marginal association test

If  $\mathbf{x}_i = 1$  for all  $i$  and  $p = 1$ , the test reduces to the marginal association test. Then,

$$\begin{aligned} t_{approx} &= l_{approx} = \text{tr}\left\{\left\{\sum_{i=1}^n (\mathbf{Q}_{\tilde{\mathbf{Z}}})_{ii}\right\}^{-1} \sum_{i=1}^n (\mathbf{Q}_{\tilde{\mathbf{Z}}})_{ii}^2\right\} = \\ &\text{tr}\left\{\text{tr}(\mathbf{Q}_{\tilde{\mathbf{Z}}})\right\}^{-1} \left\{\sum_{i=1}^n (\mathbf{Q}_{\tilde{\mathbf{Z}}})_{ii}^2\right\} = \|\mathbf{Q}_{\tilde{\mathbf{Z}}}\mathbf{u}\|^2/(n-q). \text{ For Gaussian linear model,} \\ l_{approx} &= T_{approx} = \{\|\mathbf{Q}_{\tilde{\mathbf{Z}}}\mathbf{u}\|^2/(n-q)\}/[\{\|\mathbf{Q}_{\tilde{\mathbf{Z}}}\mathbf{y}\|^2 - \|\mathbf{Q}_{\tilde{\mathbf{Z}}}\mathbf{u}\|^2/(n-q)\}/n] = \end{aligned}$$

$\{ \|\mathbf{Q}_{\bar{\mathbf{z}}}\mathbf{y}\|^2 / (n - q) / [\{ \|\mathbf{Q}_{\bar{\mathbf{z}}}\mathbf{y}\|^2 - \|\mathbf{Q}_{\bar{\mathbf{z}}}\mathbf{y}\|^2 / (n - q) \} / n] \} \approx 1$ . Thus, the mean of the test statistics is approximately one irrespective of what null model is used.

## Influence of centering $g_{l,i}$ and coding of $\mathbf{x}_i$

Our model is  $\mathbf{w}_{l,i}\beta_l + \mathbf{z}_i\gamma_l$  where  $\mathbf{w}_{l,i} = g_{l,i}\mathbf{x}_i$ . Recall that

$\mathbf{z}_i = (\mathbf{z}_{(1:p),i}, \mathbf{z}_{(1+p):q,i}) = (\mathbf{x}_i, \mathbf{z}_{(1+p):q,i})$ . Then, for any constant  $c$ ,

$$\mathbf{w}_{l,i}\beta_l + \mathbf{z}_i\gamma_l = g_{l,i}\mathbf{x}_i\beta_l + \mathbf{x}_i\gamma_{l,1:p} + \mathbf{z}_{(1+p):q,i}\gamma_{l,(1+p):q} =$$

$(g_{l,i}-c)\mathbf{x}_i\beta_l + \mathbf{x}_i(c\beta_l + \gamma_{l,1:p}) + \mathbf{z}_{(1+p):q,i}\gamma_{l,(1+p):q}$ , which implies that subtracting  $c$  from  $g_{l,i}$  does not alter the regression coefficients  $\beta_l$ . Consequently, the score test for testing  $\beta_l = \mathbf{0}$  does not change if  $g_{l,i}$  is centered. The influence is absorbed into the regression coefficients of  $\mathbf{x}_i$ .

Next, we consider the influence of coding of  $\mathbf{x}_i$ . For any invertible matrix  $\mathbf{T}$  of size  $p \times p$ , denoting its inverse by  $\mathbf{T}^{-1}$ , we have that

$$\mathbf{w}_{l,i}\beta_l + \mathbf{z}_i\gamma_l = g_{l,i}\mathbf{x}_i\beta_l + \mathbf{x}_i\gamma_{l,1:p} + \mathbf{z}_{(1+p):q,i}\gamma_{l,(1+p):q} =$$

$g_{l,i}(\mathbf{x}_i\mathbf{T})(\mathbf{T}^{-1}\beta_l) + (\mathbf{x}_i\mathbf{T})(\mathbf{T}^{-1}\gamma_{l,1:p}) + \mathbf{z}_{(1+p):q,i}\gamma_{l,(1+p):q}$ . Then,  $\beta_l = \mathbf{0}$  is equivalent to  $\mathbf{T}^{-1}\beta_l = \mathbf{0}$  since  $\mathbf{T}$  is invertible. Therefore, for any invertible matrix  $\mathbf{T}$  of size  $p \times p$ , replacing environment variables  $\mathbf{x}_i$  by  $\mathbf{x}_i\mathbf{T}$  does not alter the hypothesis test.

## Technical details of simulation studies

Here, we describe the technical details of simulation studies in the main text.

### Simulation scheme common to all scenarios

Phenotypic value  $y_i$  ( $i = 1, \dots, n$ ) is modeled by the regression model eq. (1) in “The approximation formula” section of the main text or eq. (S1), with a given environment variable  $\mathbf{x}_i$ ,  $q$  covariates  $\mathbf{z}_i = (z_{1,i}, \dots, z_{q,i})^T$  and each variant  $g_{l,i}$  ( $l = 1, \dots, L$ ). We set  $\mathbf{x}_i = (1, z_{1,i})$  (i.e. the first covariate is the environment variable) and used additive coding for  $g_{l,i}$  for each  $l$ .

For genotype data, we simulated  $n$  samples with  $L = 2000$  variants consisting of 20 independent blocks, each of which had 100 SNPs made by summing two 100-dimensional binary (0 or 1) random variables so that each element takes a value in

$\{0, 1, 2\}$  (i.e. minor allele count). The 100-dimensional binary random variables were created by thresholding correlated normal random variables using `bindata` package for R with a given correlation matrix whose diagonal and off-diagonal elements are one and  $\rho$ , respectively. That is, the correlation between any pair of genetic variants is always the same value of  $\rho$ . Minor allele frequency at each variant was generated from a pre-specified distribution (see below).

Given three effect size parameters  $b_G$ ,  $b_{GE}$  and  $b_Z$  as input, we generated phenotypic value,  $y_i$ , from the following model having the transformed conditional mean,

$$\eta_i^* = \tau(g_{1000,i})b_G + \tau(g_{1000,i})z_{1,i}b_{GE} + \sum_{j=1}^q z_{j,i}(b_Z/q), \quad (\text{S16})$$

in which  $\tau$  denotes a given genotype coding of the causal variant,  $g_{1000,i}$ , i.e. 1000th genetic variant. We considered quantitative and binary phenotypes. For quantitative phenotype, Gaussian linear regression model  $\eta_i^* + \epsilon_i$  was considered, where  $\epsilon_i \sim N(0, 1)$ . For binary phenotype, logistic regression model with success probability  $1/(1 + e^{-\eta_i^*})$  was considered.

The simulations are carried out for two sample sizes,  $n = 1000$  and  $10000$ , and for three effect size scenarios,  $b_G = 0, b_Z = 0, b_{GE} = 0$ ,  $b_G = 0, b_Z = 1, b_{GE} = 0$ , and  $b_G = 0, b_Z = 0, b_{GE} = 1$ . For the scenarios where genotypic effect exists, i.e. when  $(b_G, b_Z, b_{GE}) = (0, 1, 0)$  and  $(0, 0, 1)$ , we considered three genotype codings, additive, recessive, or dominant. We repeated the simulations 200 times to compare  $l_{approx}$  with  $l_{mean}$ .

In the following, we provide the technical details of the simulation scenarios described in Table 1 in the main text.

## Baseline scenario

**Base.** This is the baseline scenario. It is used to make other scenarios by a slight modification. The true model is the linear model in (S1) with  $q = 2$  and given  $(b_G, b_{GE}, b_Z)$  including one normally distributed covariate variable  $z_{2,i}$ . Environment variable  $z_{1,i}$ , covariate variable  $z_{2,i}$  and genotypes are independent, where  $z_{1,i}$  and  $z_{2,i}$  are independent standard normal random variables. Genotypes are in linkage equilibrium ( $\rho = 0$  where  $\rho$  is the off-diagonal element of correlation matrix among 100

SNPs in each of 20 independent blocks) with uniformly distributed minor allele frequencies in  $[0.05, 0.5]$ . The null model for all tests is correctly specified.

Other scenarios are created by the baseline scenario with modifications described below while other settings are unchanged.

## Association among environment, covariate variables and/or genotypes

**1a.** Covariate is associated with genotypes by generating independent standard normal random variables  $z_{1,i}$  (environment variable) and  $z_{2,i}^*$ , and the covariate variable  $z_{2,i}$  is set as  $z_{2,i} = z_{2,i}^*/50 + L^{-1} \sum_{l=1}^L g_{l,i}$ .

**1b.** Environment variable is associated with genotypes by generating two independent standard normal random variables  $z_{1,i}^*$  and  $z_{2,i}$  (covariate variable), and the environment variable  $z_{1,i}$  is set as  $z_{1,i} = z_{1,i}^*/50 + L^{-1} \sum_{l=1}^L g_{l,i}$ .

**1c.** Covariate and environment variables are associated with genotypes by generating two independent standard normal random variables  $z_{1,i}^*$  and  $z_{2,i}^*$ , the environment variable  $z_{1,i}$  is set as  $z_{1,i} = z_{1,i}^*/50 + L^{-1} \sum_{l=1}^L g_{l,i}$ , and the covariate variable  $z_{2,i}$  is set as  $z_{2,i} = z_{2,i}^*/50 + L^{-1} \sum_{l=1}^L g_{l,i}$ .

**1d.** Covariate is associated with environment variable by generating environment variable  $z_{1,i}$  and covariate variable  $z_{2,i}$  from a bivariate normal distribution with mean zero, variance one and correlation 0.5.

## Misspecified null model

**2a.** Covariate associated with genotypes is missed. The data is generated in the same way as scenario 1a, but the covariate  $z_{1,i}$  is ignored in the null model.

**2b.** Covariate associated with genotypes and environment variable is missed. The data is generated in the same way as scenario 1c, but the covariate  $z_{1,i}$  is ignored in the null model.



**2c.** Linear null model is incorrectly specified. Given  $(b_G, b_{GE}, b_Z)$ , data is generated from the quadratic conditional mean model,

$\eta_i^* = \tau(g_{1000,i})b_G + \tau(g_{1000,i})z_{1,i}b_{GE} + \sum_{j=1}^2 z_{j,i}(b_Z/2) - z_{1,i}^2$  rather than the linear model (S1).

**2d.** One outlier is involved. It is in the first index taking a value of 99, while the other data is generated from the linear model (S1) for  $q = 2$  and given  $(b_G, b_{GE}, b_Z)$ .

**2e.** Ten outliers are involved. These are in the first ten indexes taking a value of 99, while the other data is generated from the linear model (S1) for  $q = 2$  and given  $(b_G, b_{GE}, b_Z)$ .

### Environment/covariate variable distribution

**3a.** Environment variable  $z_{1,i}$  and five covariates  $z_{2,i}, \dots, z_{6,i}$  are independent standard normal random variables.

**3b.** Environment variable  $z_{1,i}$  and one covariate  $z_{2,i}$  are uniformly distributed in  $[0, 5]$ .

**3c.** Environment variable  $z_{1,i}$  and one covariate  $z_{2,i}$  are binary variables from independent Bernoulli distribution with success probability 0.5.

**3d.** Environment variable  $z_{1,i}$  and one covariate  $z_{2,i}$  are ordinal variable from independent binomial random variables with success probability 0.5 with number of trials 3.

### Genotype distribution

**4a.** Genotypes are in linkage disequilibrium ( $\rho = 0.5$  where  $\rho$  is the off-diagonal element of correlation matrix among 100 SNPs in each of 20 independent blocks) with uniformly distributed minor allele frequencies in  $[0.05, 0.5]$ .

**4b.** Genotypes are in linkage equilibrium ( $\rho = 0$ ) with minor allele frequencies from Beta(1,10) distribution where values outside of  $[0.05, 0.5]$  are truncated at the limit.

**4c.** Genotypes are in linkage disequilibrium ( $\rho = 0.5$ ) with minor allele frequencies from Beta(1,10) distribution where values outside of  $[0.05, 0.5]$  are truncated at the limit.
